# Supplementary material for: Ability of fabric face mask materials to filter ultrafine particles at coughing velocity
Source: PubMed Central journal article supplement — BMJ Open. 2020 Sep 22;10(9):e039424. doi: 10.1136/bmjopen-2020-039424 (PMC7509966; doi:10.1136/bmjopen-2020-039424), 2020-09-22
Supplement: bmjopen-2020-039424.draft_revisions.pdf [file bmjopen-2020-039424.draft_revisions.pdf]

# BMJ Open

BMJ Open is committed to open peer review. As part of this commitment we make the peer review history of every article we publish publicly available.

When an article is published we post the peer reviewers' comments and the authors' responses online. We also post the versions of the paper that were used during peer review. These are the versions that the peer review comments apply to.

The versions of the paper that follow are the versions that were submitted during the peer review process. They are not the versions of record or the final published versions. They should not be cited or distributed as the published version of this manuscript.

BMJ Open is an open access journal and the full, final, typeset and author-corrected version of record of the manuscript is available on our site with no access controls, subscription charges or pay-per-view fees (<http://bmjopen.bmj.com>).

If you have any questions on BMJ Open's open peer review process please email [info.bmjopen@bmj.com](mailto:info.bmjopen@bmj.com)

# BMJ Open

## Informing Homemade Emergency Facemask Design: The Ability of Common Fabrics to Filter Ultrafine Particles

|                               |                                                                                                                                                                                                                                                         |
|-------------------------------|---------------------------------------------------------------------------------------------------------------------------------------------------------------------------------------------------------------------------------------------------------|
| Journal:                      | <i>BMJ Open</i>                                                                                                                                                                                                                                         |
| Manuscript ID                 | bmjopen-2020-039424                                                                                                                                                                                                                                     |
| Article Type:                 | Original research                                                                                                                                                                                                                                       |
| Date Submitted by the Author: | 15-Apr-2020                                                                                                                                                                                                                                             |
| Complete List of Authors:     | O'Kelly, Eugenia; University of Cambridge, Department of Engineering<br>Pirog, Sophia; Northwestern University<br>Ward, James; University of Cambridge, Department of Engineering<br>Clarkson, John; University of Cambridge, Engineering Design Centre |
| Keywords:                     | Public health < INFECTIOUS DISEASES, Infection control < INFECTIOUS DISEASES, PUBLIC HEALTH, Respiratory infections < THORACIC MEDICINE, INFECTIOUS DISEASES                                                                                            |
|                               |                                                                                                                                                                                                                                                         |

SCHOLARONE™  
Manuscripts

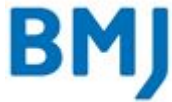

I, the Submitting Author has the right to grant and does grant on behalf of all authors of the Work (as defined in the below author licence), an exclusive licence and/or a non-exclusive licence for contributions from authors who are: i) UK Crown employees; ii) where BMJ has agreed a CC-BY licence shall apply, and/or iii) in accordance with the terms applicable for US Federal Government officers or employees acting as part of their official duties; on a worldwide, perpetual, irrevocable, royalty-free basis to BMJ Publishing Group Ltd ("BMJ") its licensees and where the relevant Journal is co-owned by BMJ to the co-owners of the Journal, to publish the Work in this journal and any other BMJ products and to exploit all rights, as set out in our [licence](#).

The Submitting Author accepts and understands that any supply made under these terms is made by BMJ to the Submitting Author unless you are acting as an employee on behalf of your employer or a postgraduate student of an affiliated institution which is paying any applicable article publishing charge ("APC") for Open Access articles. Where the Submitting Author wishes to make the Work available on an Open Access basis (and intends to pay the relevant APC), the terms of reuse of such Open Access shall be governed by a Creative Commons licence – details of these licences and which [Creative Commons](#) licence will apply to this Work are set out in our licence referred to above.

Other than as permitted in any relevant BMJ Author's Self Archiving Policies, I confirm this Work has not been accepted for publication elsewhere, is not being considered for publication elsewhere and does not duplicate material already published. I confirm all authors consent to publication of this Work and authorise the granting of this licence.

1  
2  
3 **Informing Homemade Emergency Facemask Design: The Ability of Common Fabrics to**  
4 **Filter Ultrafine Particles**  
5

6  
7 **AUTHORS**

8 Eugenia O’Kelly, Department of Engineering, University of Cambridge – currently in  
9 San Francisco, USA  
10 Orchid ID: 0000-0002-4748-3957  
11

12 Sophia Pirog, Department of Medical Social Sciences, Northwestern University –  
13 Chicago, USA  
14 Orchid ID: 0000-0003-3422-4304  
15

16  
17 James Ward, Department of Engineering, University of Cambridge – Cambridge, UK  
18 Orchid ID: 0000-0002-0362-4711  
19

20 P. John Clarkson, Department of Engineering, University of Cambridge – Cambridge,  
21 UK  
22 Orchid ID: 0000-0001-8018-7706  
23  
24  
25

26 **CORRESPONDING AUTHOR ADDRESS**

27 Eugenia O’Kelly

28  
29 999 Green St, Apt 1505  
30 San Francisco, California  
31 94133  
32 USA  
33  
34

35 Phone: 1-415-359-0092  
36 Fax: 1-415-520-6460  
37 E-mail: [eo339@cam.ac.uk](mailto:eo339@cam.ac.uk)  
38  
39  
40

41 **WORD COUNT**

42 2,026  
43  
44  
45  
46  
47  
48  
49  
50  
51  
52  
53  
54  
55  
56  
57  
58  
59  
60

## ABSTRACT

### Objectives:

To examine the ability of fabrics which might be used to create homemade face masks to filter out ultrafine (smaller than 1µm in diameter) particles.

### Method:

Twenty commonly available fabrics and materials were evaluated for their ability to reduce air concentrations of ultrafine particles. Further assessment was made on the filtration ability of select fabrics while damp and of fabric combinations which might be used to construct homemade masks.

### Results:

Single fabric layers blocked a range of ultrafine particles. When fabrics were layered, significantly more ultrafine particles were filtered. Several fabric combinations were successful in removing similar amounts of ultrafine particles when compared to an N95 mask and surgical mask.

### Conclusions:

The current coronavirus pandemic has left many communities without access to commercial facemasks. Our findings suggest that face masks made from layered common fabric can help filter ultrafine particles and provide some protection for the wearer when commercial facemasks are unavailable.

## KEYWORDS

SARS-CoV-2, Coronavirus, Infection Control, Respiratory Infections, Facemask, Public Health, Infectious Disease, PPE

## STRENGTHS AND LIMITATIONS OF THIS STUDY

- Tested a large number of potential facemask materials
- Tested ability of materials to filter virus-sized particles dry and while damp
- Did not discriminate between pathogenic and non-pathogenic particles
- Breathing resistance was estimated based on qualitative feedback

## Informing Homemade Emergency Facemask Design: The Ability of Common Fabrics to Filter Ultrafine Particles

### INTRODUCTION

The current SARS-CoV-2 outbreak has left many communities without sufficient quantities of face masks for the protection of medical staff, let alone sufficient quantities of masks for the general population's use[1]. Despite this severe shortage, many areas have begun requiring the use of facemasks for individuals who leave a green zone.

Homemade face masks have now become a necessity for many to both meet the demands that cannot be met by supply chains and/or to provide more affordable options. Although widespread online resources are available to help home sewers and makers create masks, scientific guidance on the most suitable materials is currently limited.

Though not as effective as surgical masks or respirators, homemade face masks have been shown to provide benefit in filtering viral and bacterial particles[2-4]. In addition, homemade face masks are likely to confer similar non-filtration benefits as commercial masks, such as encouraging social distancing and discouraging hand contact with the nose and mouth. Furthermore, even partial protection is likely to reduce overall pathogen exposure.

Scant evidence is available on how effective common fabrics are in filtering pathogens, nor whether the homemade masks sold online and provided to hospitals and the community are able to offer adequate protection. Little research has been done regarding the best materials to use for those seeking to create face masks at home. In addition, past studies have tested only a limited set of similar materials, namely t-shirts, sweatshirts, scarves, and tea towels. These results do not provide adequate guidance on the full scope of materials currently used for homemade mask construction.

This study aims to address the paucity of information regarding materials for face mask construction by evaluating the efficiency of twenty widely available fabrics and materials, particularly those available to the general public in filtering particles smaller than 0.1  $\mu\text{m}$  (100 nm). Both individual materials and material combinations were tested with the goal of increasing particle filtration of homemade masks. In addition, materials which could be washed and dried in very hot water were preferred for their efficacy ameliorating the risk of infection in two particular situations: (1) infection due to the reusing of masks, and (2) reduction of filtration efficacy due to moisture buildup.

Traditional in-hospital masks are intended to be used only once; however the CDC is currently encouraging individuals to reuse masks if possible<sup>[5]</sup>. This increases the risk of infection if the user comes in contact with the outside of a contaminated mask or if the mask material becomes too damp to be optimally effective. To reduce this inherent risk, we chose washable materials which could withstand hot water washing and/or hot cycle drying. In addition, as normal respiration generates moisture which can reduce the filtration efficiency of face masks, a selection of materials were tested in both damp and dry states to assess their changes in efficiency.

1  
2  
3 In conclusion, the results of this study may also inform emergency mask creation in response to  
4 environmental emergencies where ultrafine particle levels are high, such as from smoke or smog.  
5 Repeated face mask shortages during the California wildfires over the past few years have  
6 illustrated the recurring need for scientific data to guide the construction of homemade face  
7 masks when commercial supply chains are unable to meet demand.  
8  
9  
10

## 11 **METHODS**

12  
13  
14 This study was conducted in response to the rapidly growing SARS-CoV-2 outbreak. As such,  
15 priority was given to developing a test apparatus which could be constructed and provide usable  
16 results in a short amount of time.  
17  
18

19 Preference was given to materials which are widely available and not likely to become  
20 unavailable during the SARS-CoV-2 outbreak. Additional preference was given to materials  
21 which could be cleaned in a home washing machine and/or dryer at its hottest setting. All  
22 materials were washed and dried before testing. This caused significant shrinkage of the wool  
23 felt but did not hinder its efficiency, which had been pre-tested. The top-performing materials  
24 were subjected to five additional tests when damp. Dampness was achieved by applying 7  
25 milliliters of filtered water to a 2” square section of the material.  
26  
27

### 28 **Testing Apparatus**

29 Tests were conducted as described by Hutten[6]. An airtight apparatus allowed simultaneous  
30 testing of unfiltered and filtered air. A 1” diameter tube provided access to two ultrafine particle  
31 counters (P-Trak model 8525) which measured concentrations of particles 0.1 µm and smaller.  
32 The tube held a 1” diameter sample of the filter material. Readings were taken 1.5” in front of  
33 and behind the filter medium. Airflow was controlled through suction, which pulled air through  
34 the filter medium at a rate of about 16.5 m/s.  
35  
36

### 37 **Calculating Filtration Efficiency**

38 Hutten’s formula was used to assess filtration efficiency (FE).  
39  
40

$$41 \quad FE = \frac{\text{Upstream Particle Count} - \text{Downstream Particle Count} \times 100}{42 \quad \text{Upstream Particle Count}} 43$$

44 For each material or material combination, ten sets of readings were collected. Readings were  
45 collected using two P-Trak Ultrafine Particle Counters, Model 8525. Each reading was collected  
46 as a 10-second average of ultrafine air particle concentrations.  
47  
48  
49

### 50 **Interpreting Filtration efficiency**

51 The flow rate of air used in this study may represent the velocity of air expelled during human  
52 coughing[7]. As the velocity was significantly higher than in previous studies, filtration  
53 efficiency was expected to be lower. Numbers in this experiment should be interpreted as low  
54 baselines, representing material performance at high levels of stress rather than normal  
55 respiratory rates.  
56  
57  
58  
59  
60

1  
2  
3  
4 Filtration efficiency was expected to be lower than viral filtration studies, as particles larger than  
5 0.1  $\mu\text{m}$  were not measured. Many viruses are carried on droplets which are significantly larger  
6 than 0.1  $\mu\text{m}$  and may, due to their size, be more easily filtered.  
7  
8  
9

### 10 **Material Resistance**

11 To estimate the breathing resistance of each material and thus their suitability for use in a face  
12 mask, two members of the team held sections of each fabric tightly over their mouth and inhaled  
13 through their mouth. Each fabric was scored on a 0-3 scale where 3 represented a great difficulty  
14 in drawing breath, 2 represented that there was noticeable resistance but breath could be drawn, 1  
15 represented some limitation but relative ease of breathing, and 0 represented no noticeable  
16 hindrance. Combining and layering fabric was not found to significantly increase the breathing  
17 difficulty. All face mask fabric combinations scored 1 or 2.  
18  
19  
20

### 21 **Note on Study Design**

22 It should be noted that, due to the limitations imposed by this outbreak, this study was done with  
23 available materials. Data from this study should be treated as preliminary and used to inform  
24 decisions about filtration media only in relation to existing studies which assess viral filtration  
25 through the collection of viral cultures.  
26  
27

28 All effort was made to ensure the quality of the study design and accuracy of the equipment  
29 used. Ten samples were taken for each material from at least two different sections of the fabric  
30 to ensure accurate representation. Zero readings were taken on the particle testers regularly to  
31 ensure proper functioning.  
32  
33  
34

## 35 **RESULTS**

### 36 **Materials**

37 All materials blocked some ultrafine particles (see Figure 1). HEPA vacuum bags from  
38 Kenmore blocked the most ultrafine particles, with the N95 mask from 3M blocking the second  
39 greatest percentage of particles. Other materials, such as the denim jeans and windbreaker  
40 blocked a high proportion of ultrafine particles but were very difficult to breathe through (see  
41 Figure 2) and are thus ill-suited for face mask construction. These materials may be suited to a  
42 loose fitting face mask which protects from splashes. When taking into account breathing  
43 resistance and filtration efficiency, the most suitable fabrics for face mask construction were  
44 thickly felted wool, quilting cotton, and cotton flannel. A single sock held flat also compared  
45 well with the above and, when pressed tight against the nose and mouth, is a good emergency  
46 substitute for a mask.  
47  
48  
49  
50

51 Repurposing HEPA filters holds great promise for emergency facemasks; however, great care  
52 should be taken that the materials within the filter do not pose dangers to those making or  
53 wearing the face mask. While the Kenmore's single-use HEPA vacuum bag material showed the  
54 greatest ability to filter ultrafine particles, the layers fell apart when the material was cut,  
55 exposing inner layers of the fabric. The reusable, washable HEPA bags had a construction more  
56  
57  
58  
59  
60



suitable to creating emergency facemasks as the material held together well and did not expose inner fibers.

The filtration efficiencies of select materials were tested when damp (see Figure 2). Only minor differences in filtration efficiency were noted for quilting cotton, cotton flannel, and craft felt. Denim showed a significant decrease in efficiency while the HEPA single-use vacuum bags showed an increase in efficiency when damp.

### Nonwoven Fusible Interfacing

Nonwoven fusible interfacing, the kind used for stiffening collars and other areas in garments, was able to significantly improve the ability of the fabrics to filter ultrafine particles without increasing breathing resistance. Of particular note, we found that brand was important. HTC lightweight interfacing was more effective than Heat-n-Bond lightweight interfacing. Applying two layers of the Heat-n-Bond achieved similar improvements to filtration efficiency as the HTC brand. Wonder Under, a double sided, heavyweight fusible interfacing for constructing bags and craft projects, showed similar filtration ability to the HTC brand but may be too stiff to be suitable for face mask construction.

### Material Combinations

When layered to create potential face mask configurations, common fabrics were able to achieve much higher levels of ultrafine particle filtration (see Figure 1). Some material combinations were able to filter out higher percentages of ultrafine particles than the surgical or N95 mask tested, although this should not be taken to mean they provide higher levels of protection from viruses. All fabric combinations scored between a 2 and 3 on the breathing resistance test, indicating they were more difficult to breathe through than an N95 mask.

*Figure 1: The filtration efficiency of tested fabrics and fabric combinations with error bars showing 95% confidence.*

| Fabric | Fabric Weight<br>grams/meter <sup>2</sup> | Fiber<br>Composition | Ease of Breathing<br>Through Material | Dry       |    | Damp      |    |
|--------|-------------------------------------------|----------------------|---------------------------------------|-----------|----|-----------|----|
|        |                                           |                      |                                       | Mean % FE | SD | Mean % FE | SD |
|        |                                           |                      |                                       |           |    |           |    |

|                                       |       |                        |   |       |       |       |       |
|---------------------------------------|-------|------------------------|---|-------|-------|-------|-------|
| 3M N95 Mask                           | N/A   | N/A                    | 1 | 52.47 | 2.222 | 45.68 | 1.247 |
| Surgical Mask                         | N/A   | N/A                    | 2 | 47.46 | 1.087 | 42.73 | 1.664 |
| Disposable HEPA Vacuum Bags (Kenmore) | N/A   | N/A                    | 2 | 60.86 | 0.761 | 71.93 | 4.407 |
| Windbreaker                           | 2.87  | 100% Polyester         | 3 | 47.12 | 1.332 | 45.55 | 3.535 |
| Jeans Denim                           | 10.74 | 100% Cotton            | 3 | 45.94 | 2.176 | 30.69 | 5.314 |
| Washable Vacuum Bag HEPA              | N/A   | N/A                    | 2 | 43.64 | 1.852 | 44.97 | 2.267 |
| Thick felted wool                     | 10.2  | 100% Merino Wool       | 0 | 35.87 | 0.502 |       |       |
| Cotton, Heavyweight Woven             | 4.3   | 100% Cotton            | 2 | 35.77 | 2.707 |       |       |
| Folded Sock                           | N/A   | Cotton, Lycra          | 2 | 35.36 | 1.146 |       |       |
| Quilting Cotton                       | 4.4   | 100% Cotton            | 1 | 34.54 | 2.047 | 31.88 | 1.406 |
| Two Sided Minky Fabric                | 7.61  | N/A                    | 1 | 34.17 | 0.716 |       |       |
| Shirting Cotton                       | 7.2   | 100% Cotton            | 1 | 33.59 | 2.097 |       |       |
| Cotton, Lightweight Woven             | 2.5   | 100% Cotton            | 0 | 30.20 | 1.499 |       |       |
| Cotton Quilt Batting                  | 3.28  | 100% Cotton            | 0 | 29.81 | 1.270 |       |       |
| Cotton Flannel                        | 4.8   | 100% Cotton            | 1 | 28.50 | 1.529 | 30.14 | 1.196 |
| Craft Felt                            | 4.74  | Acrylic, Polyester     | 0 | 27.72 | 0.748 |       |       |
| 100% Nylon Woven                      | 1.53  | 100% Nylon             | 3 | 27.61 | 1.303 |       |       |
| T-Shirt, Heavyweight                  | 5.51  | 100% Cotton            | 1 | 25.21 | 0.471 |       |       |
| Cotton Jersey Knit                    | 6.37  | 100% Cotton            | 0 | 24.56 | 4.800 |       |       |
| Lycra                                 | 5.25  | 82% Nylon, 18% Spandex | 0 | 21.60 | 1.477 |       |       |
| Fusible Interfacing                   | N/A   | N/A                    | 0 | 15.00 | 1.672 |       |       |
| T-Shirt, Lightweight                  | 3.15  | 100% Cotton            | 0 | 10.50 | 1.293 |       |       |

*Figure 2: Chart of materials weight, composition, breathing resistance, mean FE, standard deviation of FE, and, where available, FE when damp.*

## CONCLUSIONS

Our data suggests that, in times of severe supply shortage, common fabrics can be layered to create face masks which protect wearers high percentages of ultrafine particles. It should not be inferred that these layered fabrics can protect wearers from more viral particles than N95 masks or surgical masks as our study did not discriminate between viral particles and other ultrafine particles. The difference between ultrafine particle filtration of the surgical masks, t-shirt fabric, and a woven cotton tested in this study and the viral filtration of the surgical mask, t-shirt, and mixed woven cotton seen in Davies et al.'s study were proportionally similar<sup>2</sup>. This suggests viral filtration might be proportionally similarly for other fabrics tested here but further research is needed to confirm.

It is suggested homemade face masks should not be used in place of other protective measures such as self-isolation or social distancing during this coronavirus pandemic. Rather, our results suggest homemade face masks may be a viable protective measure for those who cannot remain isolated and cannot obtain commercial face masks.

Repurposing material for homemade face masks comes with its own risks. Particular consideration should be given to respiratory hazards which may arise from the material used to construct a homemade facemask. For example, concern has been expressed that certain HEPA vacuum bags include fibers which, if inhaled, can cause lung injury. Fabrics which shed lint may also lead to lung damage if worn regularly. For this reason, we would caution those needing to create homemade face masks to ensure all material is safe, nontoxic, thoroughly prewashed, and lint-free. Fabrics which readily shed fibers may not be suited for face mask construction. The risks associated with such materials are an important area of further study, as large numbers of people are currently creating, wearing, distributing, and selling homemade facemasks. Further research should also evaluate the ability of these materials and material combinations to filter specific viruses, pollutants, and other harmful airborne particles. Additional research on homemade facemask fit and fit testing is also critical at this time.

It is our hope that this study can assist home sewers and makers to create the best facemask possible when standardized commercial personal protective equipment is unavailable. Our study shows face masks can be created from common fabrics to provide wearers with significant protection from ultrafine particles. Until further research can establish the safety and viral filtration of fabric face masks, we advise the use of approved respiratory protection whenever possible and the use of homemade face masks only when these products are unavailable.

## REFERENCES

1 Davies, A., Thompson, K. A., Giri, K., et al. Testing the efficacy of homemade masks: would they protect in an influenza pandemic? *Disaster Med Public Health Prep* 2013;7(4),413–418. <https://doi.org/10.1017/dmp.2013.43>

- 1  
2  
3 2 Ha, K. O. The Global Mask Shortage May Get Much Worse. Retrieved March 16, Bloomberg  
4 2020:from [https://www.bloomberg.com/news/articles/2020-03-10/the-global-mask-shortage-may-be-](https://www.bloomberg.com/news/articles/2020-03-10/the-global-mask-shortage-may-be-about-to-get-much-worse)  
5 [about-to-get-much-worse](https://www.bloomberg.com/news/articles/2020-03-10/the-global-mask-shortage-may-be-about-to-get-much-worse)  
6  
7 3 Hutten, I. M. *Handbook of Nonwoven Filter Media* (2nd ed.). Butterworth-Heinemann. 2015:  
8 <https://doi.org/https://doi.org/10.1016/C2011-0-05753-8>  
9  
10 4 National Centers for Disease Control and Prevention. *Strategies for Optimizing the Supply of*  
11 *Facemasks*. 2010:Retrieved from [https://www.cdc.gov/coronavirus/2019-ncov/hcp/ppe-strategy/face-](https://www.cdc.gov/coronavirus/2019-ncov/hcp/ppe-strategy/face-masks.html)  
12 [masks.html](https://www.cdc.gov/coronavirus/2019-ncov/hcp/ppe-strategy/face-masks.html)  
13  
14 5 Rengasamy, S., Eimer, B., & Shaffer, R. E. Simple respiratory protection - Evaluation of the filtration  
15 performance of cloth masks and common fabric materials against 20-1000 nm size particles. *Annals of*  
16 *Occupational Hygiene* 2010:54(7),789–798. <https://doi.org/10.1093/annhyg/meq044>  
17  
18 6 van der Sande, M., Teunis, P., & Sabel, R. (2008). Professional and Home-Made Face Masks Reduce  
19 Exposure to Respiratory Infections among the general population. *PLoS One* 2008:3(7),3–8.  
20 <https://doi.org/10.1371/journal.pone.0002618>  
21  
22 7 Zhu, S. W., Kato, S., & Yang, J. H. Study on transport characteristics of saliva droplets produced by  
23 coughing in a calm indoor environment. *Building and Environment* 2006:41(12),1691–1702.  
24 <https://doi.org/10.1016/j.buildenv.2005.06.024>  
25  
26  
27  
28  
29  
30

~ ~ ~

## AUTHOR'S CONTRIBUTIONS

### **Eugenia O'Kelly**

Conceived of the study, developed study methodology, obtained study materials and testing apparatus, collected study data, wrote manuscript

### **Sophia Pirog**

Obtained study materials, analyzed data and performed calculations, designed graphs, edited manuscript

### **James Ward**

Developed study methodology, reviewed data, edited manuscript, supervised study

### **John Clarkson**

Developed study methodology, reviewed data, edited manuscript, supervised study

## AWKNOWLEDGMENTS

The authors would like to thank Corinne E. O'Kelly for supporting this research.

## CONFLICT OF INTEREST / COMPETING INTERESTS

There are no conflicts of interests/competing interests for any of the paper's contributing authors.

**DATA STATEMENT**

Data from this study is freely available under a CC BY license on Cambridge University's Apollo open data repository.

**Link:** <https://doi.org/10.17863/CAM.51390>

**Citation:** O'Kelly, E., The Ability of Common Fabrics to Filter Ultrafine Particles [Data file]. Cambridge University: Cambridge, United Kingdom; 2020.<https://doi.org/10.17863/CAM.51390>

**FUNDING**

This research received no specific grant from any funding agency in the public, commercial or not-for-profit sectors.

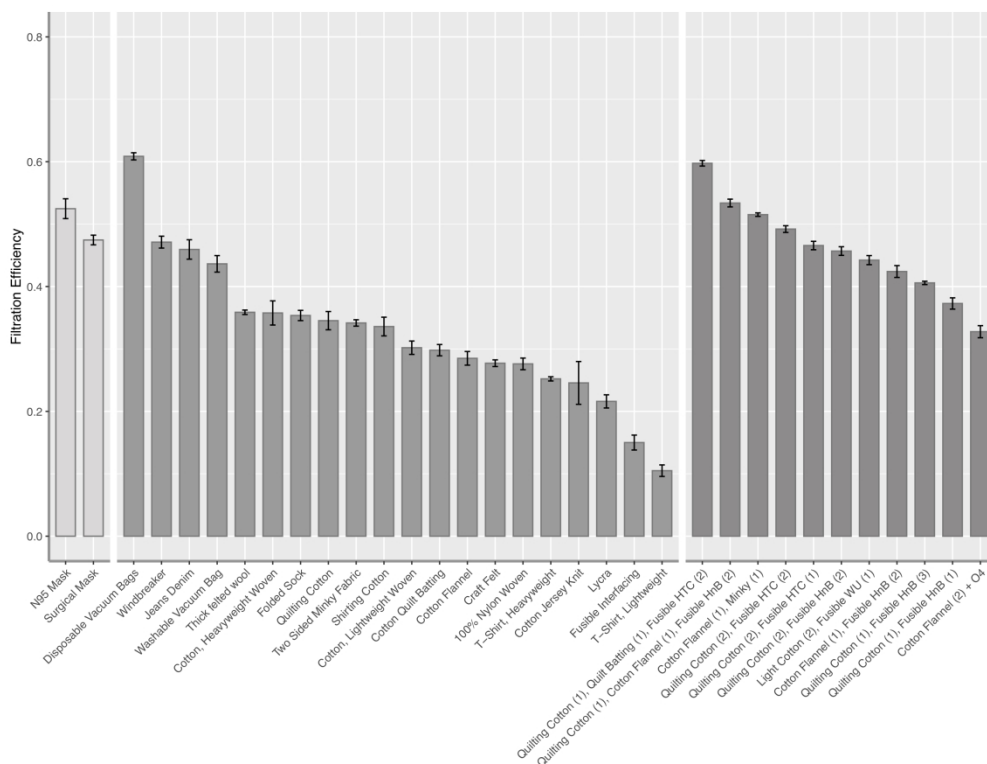

279x215mm (300 x 300 DPI)

# BMJ Open

## Ability of Fabric Facemasks Materials to Filter Ultrafine Particles at Coughing Velocity

|                                 |                                                                                                                                                                                                                                                         |
|---------------------------------|---------------------------------------------------------------------------------------------------------------------------------------------------------------------------------------------------------------------------------------------------------|
| Journal:                        | <i>BMJ Open</i>                                                                                                                                                                                                                                         |
| Manuscript ID                   | bmjopen-2020-039424.R1                                                                                                                                                                                                                                  |
| Article Type:                   | Original research                                                                                                                                                                                                                                       |
| Date Submitted by the Author:   | 18-Jun-2020                                                                                                                                                                                                                                             |
| Complete List of Authors:       | O'Kelly, Eugenia; University of Cambridge, Department of Engineering<br>Pirog, Sophia; Northwestern University<br>Ward, James; University of Cambridge, Department of Engineering<br>Clarkson, John; University of Cambridge, Engineering Design Centre |
| <b>Primary Subject Heading</b>: | Public health                                                                                                                                                                                                                                           |
| Secondary Subject Heading:      | Occupational and environmental medicine, Infectious diseases                                                                                                                                                                                            |
| Keywords:                       | Public health < INFECTIOUS DISEASES, Infection control < INFECTIOUS DISEASES, PUBLIC HEALTH, Respiratory infections < THORACIC MEDICINE, INFECTIOUS DISEASES                                                                                            |
|                                 |                                                                                                                                                                                                                                                         |

SCHOLARONE™  
Manuscripts



I, the Submitting Author has the right to grant and does grant on behalf of all authors of the Work (as defined in the below author licence), an exclusive licence and/or a non-exclusive licence for contributions from authors who are: i) UK Crown employees; ii) where BMJ has agreed a CC-BY licence shall apply, and/or iii) in accordance with the terms applicable for US Federal Government officers or employees acting as part of their official duties; on a worldwide, perpetual, irrevocable, royalty-free basis to BMJ Publishing Group Ltd ("BMJ") its licensees and where the relevant Journal is co-owned by BMJ to the co-owners of the Journal, to publish the Work in this journal and any other BMJ products and to exploit all rights, as set out in our [licence](#).

The Submitting Author accepts and understands that any supply made under these terms is made by BMJ to the Submitting Author unless you are acting as an employee on behalf of your employer or a postgraduate student of an affiliated institution which is paying any applicable article publishing charge ("APC") for Open Access articles. Where the Submitting Author wishes to make the Work available on an Open Access basis (and intends to pay the relevant APC), the terms of reuse of such Open Access shall be governed by a Creative Commons licence – details of these licences and which [Creative Commons](#) licence will apply to this Work are set out in our licence referred to above.

Other than as permitted in any relevant BMJ Author's Self Archiving Policies, I confirm this Work has not been accepted for publication elsewhere, is not being considered for publication elsewhere and does not duplicate material already published. I confirm all authors consent to publication of this Work and authorise the granting of this licence.



## Ability of Fabric Facemasks Materials to Filter Ultrafine Particles at Coughing Velocity

### AUTHORS

Eugenia O’Kelly, Department of Engineering, University of Cambridge – currently in San Francisco, USA  
Orchid ID: 0000-0002-4748-3957

Sophia Pirog, Department of Medical Social Sciences, Northwestern University – Chicago, USA  
Orchid ID: 0000-0003-3422-4304

James Ward, Department of Engineering, University of Cambridge – Cambridge, UK  
Orchid ID: 0000-0002-0362-4711

P. John Clarkson, Department of Engineering, University of Cambridge – Cambridge, UK  
Orchid ID: 0000-0001-8018-7706

### CORRESPONDING AUTHOR ADDRESS

Eugenia O’Kelly

999 Green St, Apt 1505  
San Francisco, California  
94133  
USA

Phone: 1-415-359-0092  
Fax: 1-415-520-6460  
E-mail: [eo339@cam.ac.uk](mailto:eo339@cam.ac.uk)

### WORD COUNT

3,530

## ABSTRACT

### Objectives:

We examined the ability of fabrics which might be used to create homemade face masks to filter out ultrafine (0.1µm and smaller in diameter) particles at the velocity of adult human coughing.

### Method:

Twenty commonly available fabrics and materials were evaluated for their ability to reduce air concentrations of ultrafine particles at a face velocity of 16.5 m/s. Further assessment was made on the filtration ability of select fabrics while damp and of fabric combinations which might be used to construct homemade masks.

### Results:

Single fabric layers blocked a range of ultrafine particles. When fabrics were layered, significantly more ultrafine particles were filtered. Nonwoven fusible interfacing significantly increased filtration.

### Conclusions:

The current coronavirus pandemic has left many communities without access N95 facemasks. Our findings suggest that face masks made from layered common fabric can help filter ultrafine particles and provide some protection for the wearer when commercial facemasks are unavailable.

## KEYWORDS

SARS-CoV-2, Coronavirus, Infection Control, Respiratory Infections, Facemask, Public Health, Infectious Disease, PPE

## STRENGTHS AND LIMITATIONS OF THIS STUDY

- Tested a large number of potential facemask materials, including materials currently in common use such as Lycra which have not been previously tested
- Evaluated filtration efficiency at coughing velocities, more closely mimicking use-case of masks worn for community protection than previous studies
- Assess the data from prior published work and current study, creating a picture of Filtration Efficiency and the impact of velocity
- Did not discriminate between pathogenic and non-pathogenic particles
- Breathing resistance was estimated based on qualitative feedback

## Ability of Fabric Facemasks Materials to Filter Ultrafine Particles at Coughing Velocity

### INTRODUCTION

The current SARS-CoV-2 outbreak has left many communities without sufficient quantities of face masks for the protection of medical staff and first responders, let alone sufficient quantities of masks for the general population's use. Despite this severe shortage, many areas have begun requiring the use of facemasks for individuals who leave their property. Both the United Kingdom and United States have begun mandating the use of fabric face masks for individuals while many scholars continue to strongly encourage the precautionary use of face coverings[1].

Homemade face masks have now become a necessity for many to both meet the demands that cannot be met by supply chains and/or to provide more affordable options. Although widespread online resources are available to help home sewers and makers create masks, scientific guidance on the most suitable materials is currently limited.

Though not as effective as surgical masks or respirators, homemade face masks have been shown to provide benefit in filtering viral and bacterial particles[2-4]. The primary purpose of face masks worn by the general public is to limit the spread of viral particles from respiratory activity, rather than blocking the inhalation of any contagious particles[5]. For the protection of the face-mask wearer, the Center for Disease Control specifically recommends fabric face masks for the purpose of limiting viral spread through respiratory droplet[5,6]. Face masks worn for the protection of others must efficiently filter particles emitted while coughing, when large amounts of potentially infectious respiratory droplets are produced.

Prior studies evaluating the efficacy of fabric face masks have tested their filtration ability under velocities representative of normal to active breathing[2-4]. Significantly more potentially infectious particles are generated and spread by coughing, which occurs at velocities up to 100 times greater than those tested in previous experiments[7,8]. This study evaluates the effectiveness of fabrics to filter ultrafine particles at velocities representative of adult coughing. Although no previous studies have evaluated the ability of face masks to filter particles at high velocities, evidence suggested high velocities may significantly decrease the efficacy of face mask materials[9,10].

Furthermore, past studies have tested a limited set of similar materials, namely t-shirts, sweatshirts, scarves, and tea towels. Communicating with the international community of home sewers and small businesses seeking to design face masks, we determined a need for the assessment of a much wider range of fabric types, including stretch fabrics, felts, wool, and nylon. Some fabrics, such as stretch Lycra and nylon, are in frequent use in commercial and homemade face masks but have not been evaluated for filtration efficiency. Conversations with material scientists and sewers highlighted the need to consider the possible benefits of nonwoven interfacing, a material not previously tested for filtration.

Finally, our study assesses the impact of moisture, an effect of respiration, on filtration efficiency. A selection of fabrics was tested when damp to simulate dampness from sweat or heavy respiration. Furthermore, as fabric face masks are often washed and re-worn, we tested all

1  
2  
3 materials after subjecting them to one cycle in a home laundry machine. The literature  
4 evaluating the impact of washing and drying of fabric face masks is limited. One study on one  
5 fabric face mask showed a decrease in filtration efficiency with washing[11]. All fabric materials  
6 were tested after one wash and dry in a home machine.  
7

8  
9 Both individual materials and material combinations were tested with the goal of increasing  
10 particle filtration of homemade masks.  
11

## 12 13 **METHODS**

14  
15  
16 This study was conducted in response to the rapidly growing SARS-CoV-2 outbreak. As such,  
17 priority was given to developing a test apparatus which could be constructed and provide usable  
18 results in a short amount of time.  
19

### 20 **Patient and Public Involvement**

21 The research team communicated closely with home sewers, small businesses branching out to  
22 include fabric face mask manufactures, and physicians interested in protecting at-risk patients  
23 when masks were not available. Our conversations highlighted a need for filtration information  
24 on a wider variety of materials than those assessed in previous studies. We studied a range of  
25 materials that were previously unexamined in the literature, but of high interest to the  
26 aforementioned communities. These included: felt, Lycra, felts, washable vacuum bags, and quilt  
27 batting/wadding. Materials for investigation were selected based on those that home sewers  
28 reported as being readily available. Responding to home sewers' understanding of fabric  
29 categories and the success of cotton in prior research[2-4], we also tested various weaves of  
30 cotton commonly available, including quilting cotton, shirting cotton, and cotton jersey knit.  
31  
32  
33

34 The physician and home sewing communities raised concerns regarding the risks of infection by  
35 reusing masks. In response to this, preference was given to materials which could be cleaned in  
36 a home washing machine and/or dryer at its hottest setting. All materials were washed and dried  
37 before testing. This caused significant shrinkage of wool felt. In response to further concerns  
38 about efficacy when damp, top-performing materials were subjected to five additional tests when  
39 damp.  
40  
41

### 42 **Testing Apparatus**

43 Tests were conducted as described by Hutten[12]. An airtight apparatus allowed simultaneous  
44 testing of unfiltered and filtered air. A 2.5 cm diameter tube provided access to two ultrafine  
45 particle counters (P-Trak model 8525) which measured concentrations of particles 0.1  $\mu\text{m}$  and  
46 smaller. The tube held a 2.5 cm diameter sample of the filter material. Material was allowed to  
47 relax on a flat surface and the testing mount placed on top, with excess material secured by an  
48 adjustable clip. See Figure 1 for an illustration of the testing apparatus.  
49  
50

51 After mounting a new specimen, a minimum of three minutes loading time at high velocity was  
52 given. At least thirty seconds between sequential tests on a previously loaded material was  
53 given.  
54  
55  
56  
57  
58  
59  
60

Probes for the velocity meter and particle counters were inserted halfway into the tube. Flexible sealant was used around the entry points of the probes to prevent air leakage.

#### FIGURE 1 HERE

*Figure 1: Diagram of experimental apparatus using two P-Trak Ultrafine Particle 8525 counters for simultaneous measurement and a TSI 9565 VelociCalc to measure face velocity.*

Airflow was controlled through suction, which pulled air through the filter medium at a rate of approximately 16.5 m/s. This number was chosen as a median between the average face velocity (11.2 m/s) and greatest face velocity (22 m/s) recorded in a study on saliva droplet transport by adult coughing[7]. Face velocity represents the speed of the particles when leaving the mouth. The chosen velocity was also in line with the 15.3 m/s average initial coughing velocity of an adult male measured in a 2012 study[13].

Prior to conducting high velocity tests, a calibration test was performed to validate the testing apparatus at low velocities. Five control tests at low velocity (suction placed 20 cm distance from downstream air intake) showed the N95 performance averaging 89% with a high of 93%. A high-quality PM 2.5 filter showed an average FE of 89% and a high of 90%. Velocity for this calibration test was not recorded.

#### Calculating Filtration Efficiency

Filtration efficiency represents the percent of particles a filter medium can block. Hutten's formula was used to assess filtration efficiency (FE).

$$FE = \frac{(\text{Upstream Particle Count} - \text{Downstream Particle Count}) \times 100}{\text{Upstream Particle Count}}$$

For each material or material combination, ten sets of readings were collected. Readings were collected using two P-Trak Ultrafine Particle Counters, Model 8525. Each reading was collected as a 10-second average of ultrafine air particle concentrations. The average filtration efficiency for each material was calculated. Due to the number of readings collected, the 95% confidence intervals for error bars was calculated using the appropriate *t* distribution critical value.

#### Breathing Resistance

To estimate the breathing resistance of each material, and thus their suitability for use in a face mask, two members of the team held sections of each fabric tightly over their mouth and inhaled through their mouth. Each fabric was scored on a 0-3 scale where 3 represented a great difficulty in drawing breath, 2 represented that there was noticeable resistance, but breath could be drawn, 1 represented minor limitation but relative ease of breathing, and 0 represented no noticeable hindrance. Combining and layering fabric was not found to significantly increase the breathing difficulty. All face mask fabric combinations scored 1 or 2.

#### Damp Testing

1  
2  
3 Dampness was achieved by applying 7 milliliters of filtered water, the approximate amount of  
4 water exhaled by an adult during an hour of respiration[14], to the 5 cm square section of the  
5 material.  
6  
7

### 8 9 **Note on Study Design and Limitations**

10 It should be noted that, due to the limitations imposed by this outbreak, this study was done with  
11 available materials. Data from this study should be treated as preliminary and used to inform  
12 decisions about filtration media only in relation to existing studies which assess viral filtration  
13 through the collection of viral cultures.  
14

15  
16 Ten readings were taken for each material, although one reading for the disposable HEPA  
17 vacuum bag had to be later discarded due to a data transfer error. At least two different sections  
18 of each type of fabric were tested to ensure accurate representation of the material. Zero  
19 readings were taken on the particle testers regularly to ensure proper functioning.  
20  
21

## 22 **RESULTS**

### 23 **Materials**

24  
25 All materials blocked some ultrafine particles (see Figure 2). A 3M N95 mask and hospital-  
26 grade surgical mask were tested for the sake of comparison. Two types of vacuum bag, a  
27 disposable HEPA vacuum bag and a washable HEPA vacuum bag, were evaluated due to the  
28 number of people attempting to utilize these materials as face mask filters. Eighteen fabrics were  
29 tested as a single layer. Lastly, fabrics were layered to represent potential mask designs. For this  
30 test, fusible interfacing was heat bonded to another layer.  
31  
32  
33

#### 34 **FIGURE 2 HERE**

35 *Figure 2: The filtration efficiency of tested fabrics and fabric combinations with error bars*  
36 *showing 95% confidence.*  
37  
38

39 HEPA vacuum bags blocked the most ultrafine particles, with the N95 mask from 3M blocking  
40 the second greatest percentage of particles.  
41

42 Repurposing HEPA filters holds great promise for emergency facemasks; however, great care  
43 should be taken that the component materials within the filter do not pose dangers to those  
44 making or wearing the face mask. While the single-use HEPA vacuum bag tested showed the  
45 greatest ability to filter ultrafine particles, the layers fell apart when the material was cut,  
46 exposing inner layers of the fabric. Vacuum bags may have component materials which are  
47 effective at filtering particles but which are unsafe to inhale or come into close contact with the  
48 face. The reusable, washable HEPA bags had a construction more suitable to creating  
49 emergency facemasks as the material held together well and did not expose inner fibers, but the  
50 safety of the materials used are also unknown.  
51  
52

53  
54 The filtration efficiencies of select materials were tested when damp (see Figure 3). Only minor  
55 differences in filtration efficiency were noted for quilting cotton, cotton flannel, and craft felt.  
56  
57  
58  
59

Denim showed a significant decrease in efficiency while the HEPA single-use vacuum bags showed an increase in efficiency when damp.

Figure 3 also provides breathing resistance, fabric composition, FE, and standard deviation. The most suitable fabrics for face masks are those with a high FE but low breathing resistance. Denim jeans and windbreaker fabric blocked a high proportion of ultrafine particles but were extremely difficult to breathe through (see Figure 3). The windbreaker fabric may be suited to a loose-fitting face mask which protects the wearer from liquid droplets or splashes but is unsuitable for filtration.

Suitable materials which showed high filtration efficiency and low breathing resistance included felted wool, quilting cotton, and cotton flannel. A single sock held flat compared well with the quilting cotton and, when pressed tight against the nose and mouth, may provide emergency protection.

### **Nonwoven Fusible Interfacing**

Nonwoven fusible interfacing, the kind used for stiffening collars and other areas in garments, was able to significantly improve the ability of the fabrics to filter ultrafine particles without increasing breathing resistance. Of particular note, we found that brands exhibited significant differences in filtering performance. HTC brand lightweight interfacing was more effective than Heat-n-Bond brand lightweight interfacing. Applying two layers of the Heat-n-Bond achieved similar improvements to filtration efficiency as the HTC brand. Wonder Under, a double sided, heavyweight fusible interfacing for constructing bags and craft projects, showed similar filtration ability to the HTC brand but may be too stiff to be suitable for face mask construction.

### **Material Combinations**

When layered to create potential face mask configurations, common fabrics were able to achieve much higher levels of ultrafine particle filtration (see Figure 2). Some material combinations were able to filter out higher percentages of ultrafine particles than the surgical or N95 masks tested, although this should not be taken to mean they provide higher levels of protection from viruses. All fabric combinations scored between a 2 and 3 on the breathing resistance test, indicating they were more difficult to breathe through than an N95 mask.

FIGURE 3 HERE

*Figure 3: Chart of materials composition, breathing resistance, mean FE, standard deviation of FE, and, where available, FE when damp.*

## **DISCUSSION**

Our data suggests that, in times of severe supply shortage, common fabrics can be layered to create face masks which protect wearers and others from a significant percentage of ultrafine

1  
2  
3 particles. It should not be inferred that these layered fabrics can protect wearers from more viral  
4 particles than N95 masks or surgical masks as our study did not discriminate between viral  
5 particles and other ultrafine particles. Many viruses are carried on droplets or other particles  
6 significantly larger than those in tested here. Furthermore, these results do not incorporate the  
7 challenges of achieving fit, a critical factor of facemask design. The benefit of using materials  
8 which offer high filtration efficiency are likely to be significantly reduced or negated if the mask  
9 is worn with a poor fit.  
10  
11

12 Many viruses are carried on droplets or other particles significantly larger than those in tested  
13 here. Previous studies have shown that large particles are more readily filtered[3,4] than smaller  
14 particles, indicating that a study of ultrafine particles will lead to a low 'baseline', upon which  
15 filtration efficiency of larger particles will increase. Moreover, ultrafine particles tend to pose  
16 high risks during other emergency situations when fabric face masks are needed, such as forest  
17 fire outbreaks and times of high, concentrated pollution.  
18  
19  
20  
21

### 22 **The Effect of Velocity on Filtration Efficiency**

23 The flow rate of air used in this study represents the velocity of air expelled during human  
24 coughing[7] and is the first such study to evaluate fabric filtration under high velocities. A  
25 velocity of 16.5 m/s or 1650 cm/s was chosen to represent the face velocity of an adult  
26 coughing[7]. N95 filtration efficiency of NaCl was seen to decrease with velocity in prior  
27 filtration studies, from 99% in Rengasamy et al's evaluation at 0.165 m/s to 85% in Konda et  
28 al's evaluation at 0.26 m/s. As the velocity was up to 100 times greater than Rengasamy et al's  
29 and 63 times greater than Konda et al's, filtration efficiency was expected to be significantly  
30 lower if velocity impacts filtration efficiency. Our results support the idea that velocity has a  
31 significant impact on filtration efficiency.  
32  
33

34 Popular mask filtration which specify a face velocity include FDA-PFE, and ASTM-PFE and  
35 utilize velocities ranging from 0.5 to 25 cm/sec. Several testing methods do not specify a face  
36 velocity but instead provide flow rate for particle generation. While face velocity cannot be  
37 derived from flow rate, the flow rates utilized in these methods of 85 L/min in the NIOSHE NaCl  
38 test and 28.3 L/min in the ASTM-BFE test are lower than Konda et al's upper flow rate of 90  
39 L/min, which corresponded to a face velocity of 0.26 m/s.  
40  
41

42 No prior studies have evaluated the ability of N95 face masks to filter particles at such high face  
43 velocities which can be used as a direct comparison. Rangasamy's 2015 study on synthetic  
44 blood penetration of N95 masks found that the number of respirator samples which failed the  
45 blood penetration test increased with increasing test velocities[10]. This, along with our  
46 findings, indicates a strong need to further evaluate mask filtration at high velocities. While a  
47 leak around the downstream testing port could lead to a lowered particle count, the possibility of  
48 low performance at high velocities should be eliminated through further study.  
49  
50  
51

### 52 **Comparing Fabric Filtration Efficiency**

53 Although the results from higher velocity tests are significantly lower than previous tests, the  
54 shape of the data remains highly consistent with prior studies. The average velocity used in prior  
55  
56  
57  
58  
59  
60



1  
2  
3 studies is 0.20 m/s, which is 82.5% of the velocity used in the prior study. When the values for  
4 high velocity filtration are increased by 82.5%, the data compares closely with data from  
5 previous research. Figure 4 compares data from studies which examine fabric filtration. Where  
6 applicable, the data chosen represented similar particle size filtration and the highest velocities  
7 offered. It should be noted that each test utilizes different methods of testing filtration efficiency  
8 and different brands of materials. Konda et al applies a maximum face velocity of 0.26 m/s  
9 utilizing NaCL aerosol (approximately 0.74  $\mu\text{m}$ ). Rengasamy et al similarly uses aerosolized  
10 NaCL at the lowest face velocity of 0.165 m/s. Davies et al assesses the filtration of  
11 Bacteriophage MS2 (0.023  $\mu\text{m}$ ) at a face velocity of 0.2 m/s. Despite the differences in testing  
12 method, velocities used, and differences in product brands, the compiled data shows close  
13 groupings of filtration efficiency. Data on T-Shirt filtration in the present study is presented for  
14 both the lightweight and heavyweight t-Shirt.  
15  
16  
17

#### 18 FIGURE 4 HERE

19 *Figure 4: A comparison of existing data on fabric ultrafine filtration. Data chosen represents*  
20 *the highest velocity for each study. Data from this study was adjusted to proportionally*  
21 *represent a velocity of 0.2 m/s for this comparison. Data from Rengasamy et al is estimated*  
22 *from the included graphs, as statistical information about the data was not provided.*  
23  
24

25 A comparison showed that no one study method consistently produced the highest results.  
26 Konda, who recorded the highest fabric FE also recorded the lowest FE for N95 and surgical  
27 masks. Surprisingly, Rengasamy et al's data does not closely resemble Konda et al's, although  
28 both studies compared NaCL filtration. This may be a factor of the Konda et al's filtration  
29 studied at a greater velocity than Rengasamy et al uses, another indication for the importance of  
30 velocity on filtration. Our FE for fabric was frequently lower than others, a fact which may be  
31 accounted for with our single wash of the material before testing[11] and provide further  
32 evidence that washing fabric masks reduces their filtration efficiency.  
33  
34

#### 35 **Safety Considerations**

36 It is suggested homemade face masks should not be used in place of other protective measures  
37 such as self-isolation or social distancing. Rather, our results suggest homemade face masks  
38 may be a viable protective measure for those who cannot remain isolated and cannot obtain  
39 commercial face masks.  
40  
41

42 Repurposing material for homemade face masks comes with its own risks. Consideration should  
43 be given to respiratory hazards which may arise from the material used to construct a homemade  
44 facemask. For example, concern has been expressed that certain HEPA vacuum bags include  
45 fibers which, if inhaled, can cause lung injury. Lint and fibers from fabric, when inhaled in large  
46 quantities, and known to contribute to multiple lung problems including asthma, byssinosis, and  
47 bronchitis. For this reason, we would caution those needing to create homemade face masks to  
48 ensure all material is safe, nontoxic and lint-free. Fabrics which readily shed fibers may not be  
49 suited for face mask construction. The risks associated with such materials are an important area  
50 of further study, as large numbers of people are currently creating, wearing, washing,  
51 distributing, and selling homemade facemasks. Further research should further evaluate the  
52 ability of these materials and material combinations to filter specific viruses, pollutants, and  
53  
54  
55  
56  
57  
58  
59

1  
2  
3 other harmful airborne particles. Additional research on homemade facemask fit and fit testing  
4 is also critical at this time.  
5

6  
7 It is our hope that this study can assist home sewers and makers to create the best facemask  
8 possible when standardized commercial personal protective equipment is unavailable. Our study  
9 shows face masks can be created from common fabrics to provide wearers with significant  
10 protection from ultrafine particles. Until further research can establish the safety and viral  
11 filtration of fabric face masks, we suggest the use of approved respiratory protection whenever  
12 possible and the use of homemade face masks only when these products are unavailable.  
13

14  
15 It should be noted that the results of this study may also inform emergency mask creation in  
16 response to environmental emergencies where ultrafine particle levels are particularly dangerous,  
17 such as in the case of smoke or smog. Repeated face mask shortages during the California  
18 wildfires over the past few years have illustrated the recurring need for scientific data to guide  
19 the construction of homemade face masks when commercial supply chains are unable to meet  
20 demand.  
21  
22  
23

## 24 REFERENCES

- 25 1. Greenhalgh T, Schmid MB, Czypionka T, Bassler D, Gruer L. Face masks for the public  
26 during the covid-19 crisis. *BMJ* [Internet]. 2020;369(April):1–4. Available from:  
27 <http://dx.doi.org/doi:10.1136/bmj.m1435>
- 28 2. Davies A, Thompson KA, Giri K, Kafatos G, Walker J, Bennett A. Testing the efficacy of  
29 homemade masks: would they protect in an influenza pandemic? *Disaster Med Public*  
30 *Health Prep.* 2013;7(4):413–8.
- 31 3. Konda A, Prakash A, Moss GA, Schmoltd M, Grant GD, Guha S. Aerosol Filtration  
32 Efficiency of Common Fabrics Used in Respiratory Cloth Masks. *ACS Nano.* 2020;
- 33 4. Rengasamy S, Eimer B, Shaffer RE. Simple respiratory protection - Evaluation of the  
34 filtration performance of cloth masks and common fabric materials against 20-1000 nm  
35 size particles. *Ann Occup Hyg.* 2010;54(7):789–98.
- 36 5. National Centers for Disease Control and Prevention. Use of Cloth Face Coverings to  
37 Help Slow the Spread of COVID-19 [Internet]. 2020. Available from:  
38 [https://www.cdc.gov/coronavirus/2019-ncov/prevent-getting-sick/diy-cloth-face-](https://www.cdc.gov/coronavirus/2019-ncov/prevent-getting-sick/diy-cloth-face-coverings.html)  
39 [coverings.html](https://www.cdc.gov/coronavirus/2019-ncov/prevent-getting-sick/diy-cloth-face-coverings.html)
- 40 6. National Centers for Disease Control and Prevention. Strategies for Optimizing the Supply  
41 of Facemasks [Internet]. 2010. Available from: [https://www.cdc.gov/coronavirus/2019-](https://www.cdc.gov/coronavirus/2019-ncov/hcp/ppe-strategy/face-masks.html)  
42 [ncov/hcp/ppe-strategy/face-masks.html](https://www.cdc.gov/coronavirus/2019-ncov/hcp/ppe-strategy/face-masks.html)
- 43 7. Zhu SW, Kato S, Yang JH. Study on transport characteristics of saliva droplets produced  
44 by coughing in a calm indoor environment. *Build Environ.* 2006;41(12):1691–702.
- 45 8. Tang JW, Nicolle AD, Klettner CA, Pantelic J, Wang L, Suhaimi A Bin, et al. Airflow  
46 Dynamics of Human Jets: Sneezing and Breathing - Potential Sources of Infectious  
47 Aerosols. *PLoS One.* 2013;8(4):1–7.
- 48 9. Delft University of Technology. Project Mask [Internet]. Delft, Netherlands: YouTube;  
49 2020. Available from: <https://www.youtube.com/watch?v=i968cqeWyyY>
- 50 10. Rengasamy S, Sbarra D, Nwoko J, Shaffer R. Resistance to synthetic blood penetration of  
51 National Institute for Occupational Safety and Health-approved N95 filtering facepiece  
52  
53  
54  
55  
56  
57  
58  
59

- 1  
2  
3 respirators and surgical N95 respirators. Am J Infect Control [Internet].  
4 2015;43(11):1190–6. Available from: <http://dx.doi.org/10.1016/j.ajic.2015.06.014>  
5  
6 11. Neupane BB, Mainali S, Sharma A, Giri B. Optical microscopic study of surface  
7 morphology and filtering efficiency of face masks. Peer J. 2019;  
8 12. Hutten IM. Handbook of Nonwoven Filter Media. 2nd ed. Butterworth-Heinemann; 2015.  
9 343–408 p.  
10 13. Kwon SB, Park J, Jang J, Cho Y, Park DS, Kim C, et al. Study on the initial velocity  
11 distribution of exhaled air from coughing and speaking. Chemosphere [Internet].  
12 2012;87(11):1260–4. Available from:  
13 <http://dx.doi.org/10.1016/j.chemosphere.2012.01.032>  
14  
15 14. Zieliński J, Przybylski J. How much water is lost during breathing? Pneumonol Alergol  
16 Pol [Internet]. 2012;80(4):339–42. Available from:  
17 <http://www.ncbi.nlm.nih.gov/pubmed/22714078>  
18  
19  
20  
21  
22  
23  
24  
25  
26  
27  
28  
29  
30  
31  
32  
33  
34  
35  
36  
37  
38  
39  
40  
41  
42  
43  
44  
45  
46  
47  
48  
49  
50  
51  
52  
53  
54  
55  
56  
57  
58  
59  
60

~ ~ ~

## AUTHOR'S CONTRIBUTIONS

### **Eugenia O'Kelly**

Conceived of the study, developed study methodology, obtained study materials and testing apparatus, collected study data, wrote manuscript

### **Sophia Pirog**

Obtained study materials, analyzed data and performed calculations, designed graphs, edited manuscript

### **James Ward**

Developed study methodology, reviewed data, edited manuscript, supervised study

### **John Clarkson**

Developed study methodology, reviewed data, edited manuscript, supervised study

## AWKNOWLEDGMENTS

The authors would like to thank Corinne E. O'Kelly for supporting this research. We would also like to thank the many sewers, doctors, and designers who spoke with us about their needs and concerns.

## CONFLICT OF INTEREST / COMPETING INTERESTS

There are no conflicts of interests/competing interests for any of the paper's contributing authors.

## DATA STATEMENT

Data from this study is freely available under a CC BY license on Cambridge University's Apollo data repository.

**Link:** <https://doi.org/10.17863/CAM.51390>

**Citation:** O'Kelly, E., The Ability of Common Fabrics to Filter Ultrafine Particles [Data file]. Cambridge University: Cambridge, United Kingdom; 2020. <https://doi.org/10.17863/CAM.51390>

## FUNDING

This research received no specific grant from any funding agency in the public, commercial or not-for-profit sectors.

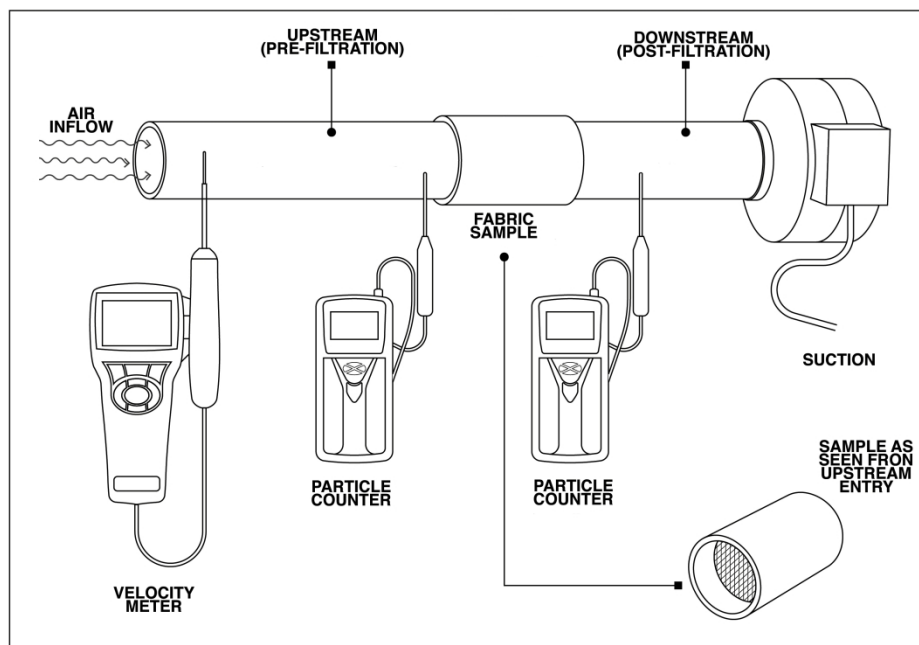

Figure 1: Diagram of experimental apparatus using two P-Trak Ultrafine Particle 8525 counters for simultaneous measurement and a TSI 9565 VelociCalc to measure face velocity.

1267x904mm (72 x 72 DPI)

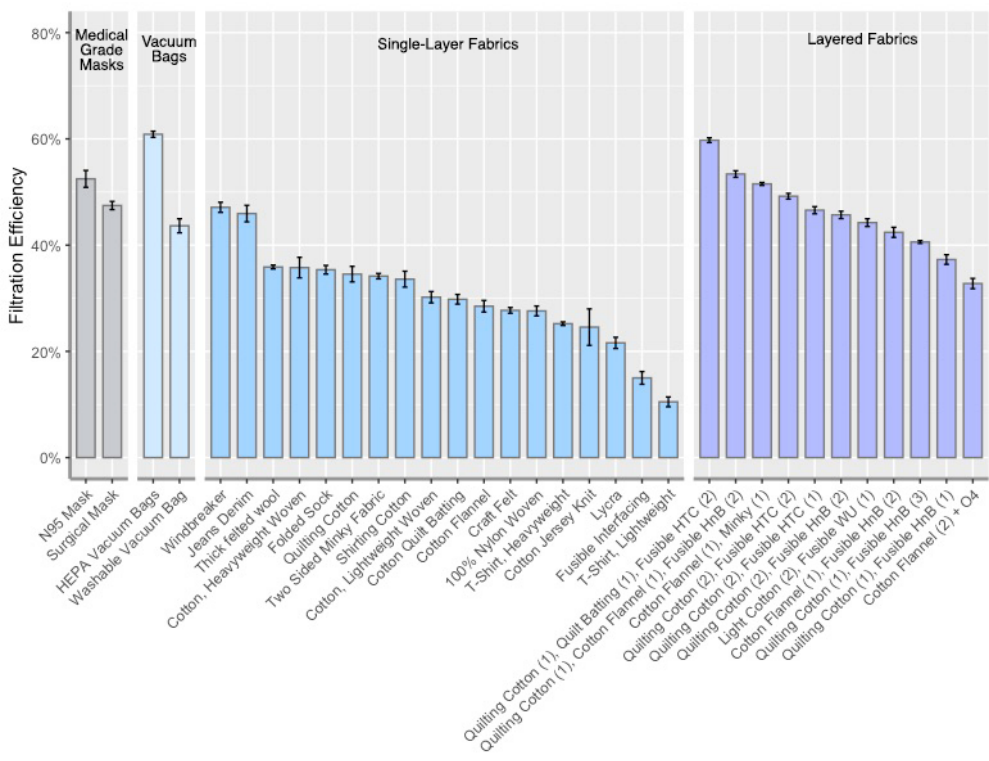

Figure 2: The filtration efficiency of tested fabrics and fabric combinations with error bars showing 95% confidence.

274x211mm (72 x 72 DPI)

| Fabric                      | Brand         | Fiber Composition         | Ease of Breathing Through Material | Dry       |       | Damp      |       |
|-----------------------------|---------------|---------------------------|------------------------------------|-----------|-------|-----------|-------|
|                             |               |                           |                                    | Mean % FE | SD    | Mean % FE | SD    |
| N95 Mask                    | 3M            | N/A                       | 1                                  | 52.47     | 2.222 | 45.68     | 1.247 |
| Surgical Mask               |               | N/A                       | 2                                  | 47.46     | 1.087 | 42.73     | 1.664 |
| Disposable HEPA Vacuum Bags | Kenmore       | N/A                       | 2                                  | 60.86     | 0.761 | 71.93     | 4.407 |
| Windbreaker                 |               | 100% Polyester            | 3                                  | 47.12     | 1.332 | 45.55     | 3.535 |
| Jeans Denim                 |               | 100% Cotton               | 3                                  | 45.94     | 2.176 | 30.69     | 5.314 |
| Washable Vacuum Bag HEPA    | CanineCoddler | N/A                       | 2                                  | 43.64     | 1.852 | 44.97     | 2.267 |
| Thick felted wool           | Weir Crafts   | 100% Merino Wool          | 0                                  | 35.87     | 0.502 |           |       |
| Cotton, Heavyweight Woven   |               | 100% Cotton               | 2                                  | 35.77     | 2.707 |           |       |
| Folded Sock                 |               | Cotton, Lycra             | 2                                  | 35.36     | 1.146 |           |       |
| Quilting Cotton             |               | 100% Cotton               | 1                                  | 34.54     | 2.047 | 31.88     | 1.406 |
| Two Sided Minky Fabric      |               | N/A                       | 1                                  | 34.17     | 0.716 |           |       |
| Shirting Cotton             |               | 100% Cotton               | 1                                  | 33.59     | 2.097 |           |       |
| Cotton, Lightweight Woven   |               | 100% Cotton               | 0                                  | 30.20     | 1.499 |           |       |
| Cotton Quilt Batting        |               | 100% Cotton               | 0                                  | 29.81     | 1.270 |           |       |
| Cotton Flannel              |               | 100% Cotton               | 1                                  | 28.50     | 1.529 | 30.14     | 1.196 |
| Craft Felt                  | Misscrafts    | Rayon, Acrylic, Polyester | 0                                  | 27.72     | 0.748 |           |       |
| 100% Nylon Woven            |               | 100% Nylon                | 3                                  | 27.61     | 1.303 |           |       |
| T-Shirt, Heavyweight        | Gildan        | 100% Cotton               | 1                                  | 25.21     | 0.471 |           |       |
| Cotton Jersey Knit          |               | 100% Cotton               | 0                                  | 24.56     | 4.800 |           |       |
| Lycra                       |               | 82% Nylon, 18% Spandex    | 0                                  | 21.60     | 1.477 |           |       |
| Fusible Interfacing         | HTC           | N/A                       | 0                                  | 15.00     | 1.672 |           |       |
| T-Shirt, Lightweight        | Retro Brant   | 50% Polyester, 50% Cotton | 0                                  | 10.50     | 1.293 |           |       |

1  
2  
3  
4  
5  
6  
7  
8  
9  
10  
11  
12  
13  
14  
15  
16  
17  
18  
19  
20  
21  
22  
23  
24  
25  
26  
27  
28  
29  
30  
31  
32  
33  
34  
35  
36  
37  
38  
39  
40  
41  
42  
43  
44  
45  
46  
47  
48  
49  
50  
51  
52  
53  
54  
55  
56  
57  
58  
59  
60

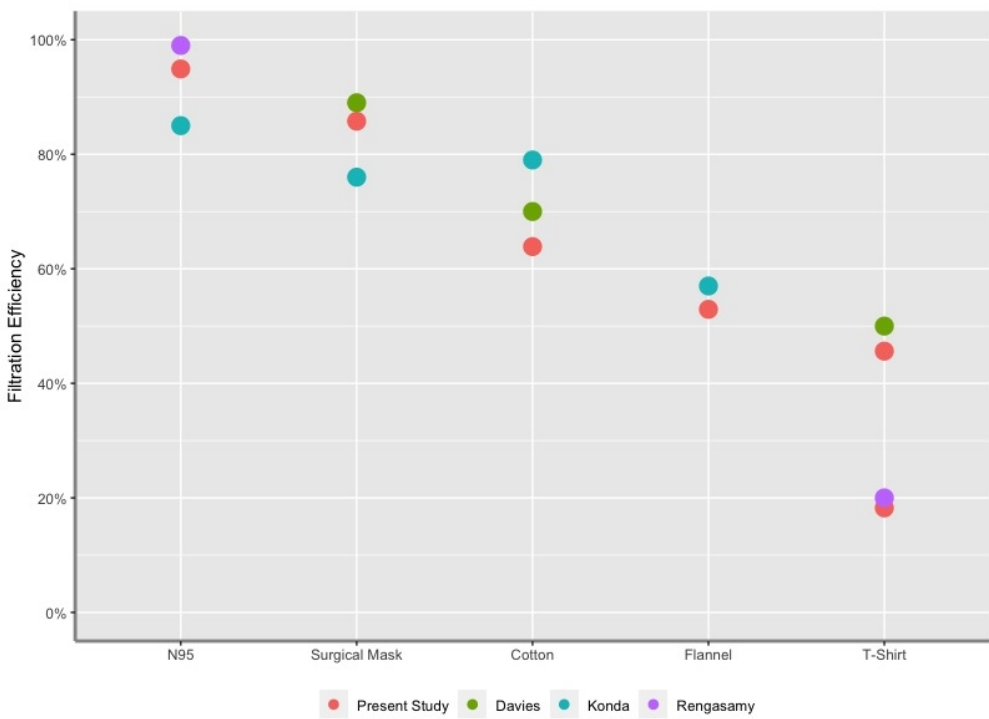

Figure 4: A comparison of existing data on fabric ultrafine filtration. Data chosen represents the highest velocity for each study. Data from this study was adjusted to proportionally represent a velocity of 0.2 m/s for this comparison. Data from Rengasamy et al is estimated from the included graphs, as statistical information about the data was not provided.

282x208mm (72 x 72 DPI)



# BMJ Open

## Ability of Fabric Facemasks Materials to Filter Ultrafine Particles at Coughing Velocity

|                                 |                                                                                                                                                                                                                                                         |
|---------------------------------|---------------------------------------------------------------------------------------------------------------------------------------------------------------------------------------------------------------------------------------------------------|
| Journal:                        | <i>BMJ Open</i>                                                                                                                                                                                                                                         |
| Manuscript ID                   | bmjopen-2020-039424.R2                                                                                                                                                                                                                                  |
| Article Type:                   | Original research                                                                                                                                                                                                                                       |
| Date Submitted by the Author:   | 15-Aug-2020                                                                                                                                                                                                                                             |
| Complete List of Authors:       | O'Kelly, Eugenia; University of Cambridge, Department of Engineering<br>Pirog, Sophia; Northwestern University<br>Ward, James; University of Cambridge, Department of Engineering<br>Clarkson, John; University of Cambridge, Engineering Design Centre |
| <b>Primary Subject Heading</b>: | Public health                                                                                                                                                                                                                                           |
| Secondary Subject Heading:      | Occupational and environmental medicine, Infectious diseases                                                                                                                                                                                            |
| Keywords:                       | Public health < INFECTIOUS DISEASES, Infection control < INFECTIOUS DISEASES, PUBLIC HEALTH, Respiratory infections < THORACIC MEDICINE, INFECTIOUS DISEASES                                                                                            |
|                                 |                                                                                                                                                                                                                                                         |

SCHOLARONE™  
Manuscripts



I, the Submitting Author has the right to grant and does grant on behalf of all authors of the Work (as defined in the below author licence), an exclusive licence and/or a non-exclusive licence for contributions from authors who are: i) UK Crown employees; ii) where BMJ has agreed a CC-BY licence shall apply, and/or iii) in accordance with the terms applicable for US Federal Government officers or employees acting as part of their official duties; on a worldwide, perpetual, irrevocable, royalty-free basis to BMJ Publishing Group Ltd ("BMJ") its licensees and where the relevant Journal is co-owned by BMJ to the co-owners of the Journal, to publish the Work in this journal and any other BMJ products and to exploit all rights, as set out in our [licence](#).

The Submitting Author accepts and understands that any supply made under these terms is made by BMJ to the Submitting Author unless you are acting as an employee on behalf of your employer or a postgraduate student of an affiliated institution which is paying any applicable article publishing charge ("APC") for Open Access articles. Where the Submitting Author wishes to make the Work available on an Open Access basis (and intends to pay the relevant APC), the terms of reuse of such Open Access shall be governed by a Creative Commons licence – details of these licences and which [Creative Commons](#) licence will apply to this Work are set out in our licence referred to above.

Other than as permitted in any relevant BMJ Author's Self Archiving Policies, I confirm this Work has not been accepted for publication elsewhere, is not being considered for publication elsewhere and does not duplicate material already published. I confirm all authors consent to publication of this Work and authorise the granting of this licence.

## Ability of Fabric Face Masks Materials to Filter Ultrafine Particles at Coughing Velocity

### AUTHORS

Eugenia O’Kelly, Department of Engineering, University of Cambridge – currently in San Francisco, USA  
Orchid ID: 0000-0002-4748-3957

Sophia Pirog, Department of Medical Social Sciences, Northwestern University – Chicago, USA  
Orchid ID: 0000-0003-3422-4304

James Ward, Department of Engineering, University of Cambridge – Cambridge, UK  
Orchid ID: 0000-0002-0362-4711

P. John Clarkson, Department of Engineering, University of Cambridge – Cambridge, UK  
Orchid ID: 0000-0001-8018-7706

### CORRESPONDING AUTHOR ADDRESS

Eugenia O’Kelly

999 Green St, Apt 1505  
San Francisco, California  
94133  
USA

Phone: 1-415-359-0092  
Fax: 1-415-520-6460  
E-mail: [eo339@cam.ac.uk](mailto:eo339@cam.ac.uk)

### WORD COUNT

3,530

## ABSTRACT

### Objectives:

We examined the ability of fabrics which might be used to create homemade face masks to filter out ultrafine (0.02  $\mu\text{m}$  - 0.1 $\mu\text{m}$ ) particles at the velocity of adult human coughing.

### Method:

Twenty commonly available fabrics and materials were evaluated for their ability to reduce air concentrations of ultrafine particles at a coughing face velocities. Further assessment was made on the filtration ability of selected fabrics while damp and of fabric combinations which might be used to construct homemade masks.

### Results:

Single fabric layers blocked a range of ultrafine particles. When fabrics were layered, a higher percentage of ultrafine particles were filtered. The average filtration efficiency of single layer fabrics 32% and average layered combination was 45%. Nonwoven fusible interfacing, when combined with other fabrics, could add up to 11% addition filtration efficiency. However, fabric and fabric combinations were more difficult to breathe through than N95 masks.

### Conclusions:

The current coronavirus pandemic has left many communities without access to N95 face masks. Our findings suggest that face masks made from layered common fabric can help filter ultrafine particles and provide some protection for the wearer when commercial face masks are unavailable.

### KEYWORDS

SARS-CoV-2, Coronavirus, Infection Control, Respiratory Infections, Face mask, Public Health, Infectious Disease, PPE

### STRENGTHS AND LIMITATIONS OF THIS STUDY

- Tested a large number of potential face mask materials, including materials currently in common use such as Lycra which have not been previously tested
- Evaluated filtration efficiency at coughing velocities, more closely mimicking use-case of masks worn for community protection than previous studies
- Assess the data from prior published work and current study, creating a picture of Filtration Efficiency and the impact of velocity
- Did not discriminate between pathogenic and non-pathogenic particles
- Breathing resistance was estimated based on qualitative feedback

## Ability of Fabric Face Masks Materials to Filter Ultrafine Particles at Coughing Velocity

### INTRODUCTION

The current SARS-CoV-2 outbreak has left many communities without sufficient quantities of face masks for the protection of medical staff and first responders, let alone sufficient quantities of masks for the general population's use. Policies requiring or requesting individuals to wear face masks when they leave their homes have been implemented in most governmental regions throughout the world, with over 180 countries specifically recommend wearing face masks at the time this article was written[1].

Homemade face masks have now become a necessity for many to both meet the demands that cannot be met by supply chains and/or to provide more affordable options. Although widespread online resources are available to help home sewers and makers create masks, scientific guidance on the most suitable materials is currently limited.

Though not as effective as surgical masks or respirators, homemade face masks have been shown to provide benefit in filtering viral and bacterial particles[2-4]. The primary purpose of face masks worn by the general public is to limit the spread of viral particles from respiratory activity, rather than blocking the inhalation of any contagious particles[5]. For the protection of the face-mask wearer, the Center for Disease Control specifically recommends fabric face masks for the purpose of limiting viral spread through respiratory droplet[5,6]. Face masks worn for the protection of others must efficiently filter particles emitted while coughing, when large amounts of potentially infectious respiratory droplets are produced.

Prior studies evaluating the efficacy of fabric face masks have tested their filtration ability under velocities representative of normal to active breathing[2-4]. Significantly more potentially infectious particles are generated and spread by coughing, which occurs at velocities up to 100 times greater than those tested in previous experiments[7,8]. This study evaluates the effectiveness of fabrics to filter ultrafine particles at velocities representative of adult coughing. Although no previous studies have evaluated the ability of face masks to filter particles at high velocities, evidence suggested high velocities may significantly decrease the efficacy of face mask materials[9,10].

Furthermore, past studies have tested a limited set of similar materials, namely t-shirts, sweatshirts, scarves, and tea towels[2-4]. Communicating with the international community of home sewers and small businesses seeking to design face masks, we determined a need for the assessment of a much wider range of fabric types, including stretch fabrics, felts, wool, and nylon. Some fabrics, such as stretch Lyrics and nylon, are in frequent use in commercial and homemade face masks but have not been evaluated for filtration efficiency. Conversations with material scientists and sewers highlighted the need to consider the possible benefits of nonwoven interfacing, a material not previously tested for filtration.

Finally, our study assesses the impact of moisture, an effect of respiration, on filtration efficiency. A selection of fabrics was tested when damp to simulate dampness from sweat or heavy respiration. Furthermore, as fabric face masks are often washed and re-worn, we tested all

1  
2  
3 materials after subjecting them to one cycle in a home laundry machine. The literature  
4 evaluating the impact of washing and drying of fabric face masks is limited. One study on one  
5 fabric face mask showed a decrease in filtration efficiency with washing[11]. All fabric materials  
6 were tested after one wash and dry in a home machine.  
7

8  
9 Both individual materials and material combinations were tested with the goal of increasing  
10 particle filtration of homemade masks.  
11

## 12 13 **METHODS**

14  
15  
16 This study was conducted in response to the rapidly growing SARS-CoV-2 outbreak. As such,  
17 priority was given to developing a test apparatus which could be constructed and provide usable  
18 results in a short amount of time.  
19

### 20 **Patient and Public Involvement**

21 The research team communicated closely with home sewers, small businesses branching out to  
22 include fabric face mask manufactures, and physicians interested in protecting at-risk patients  
23 when masks were not available. Our conversations highlighted a need for filtration information  
24 on a wider variety of materials than those assessed in previous studies. We studied a range of  
25 materials that were previously unexamined in the literature, but of high interest to the  
26 aforementioned communities. These included: felt, Lycra, felts, washable vacuum bags, and quilt  
27 batting/wadding. Materials for investigation were selected based on those that home sewers  
28 reported as being readily available. Responding to home sewers' understanding of fabric  
29 categories and the success of cotton in prior research[2-4], we also tested various weaves of  
30 cotton commonly available, including quilting cotton, shirting cotton, and cotton jersey knit.  
31  
32  
33

34 The physician and home sewing communities raised concerns regarding the risks of infection by  
35 reusing masks. In response to this, preference was given to materials which could be cleaned in  
36 a home washing machine and/or dryer at its hottest setting. All materials were washed and dried  
37 before testing. This caused significant shrinkage of wool felt. In response to further concerns  
38 about efficacy when damp, top-performing materials were subjected to five additional tests when  
39 damp.  
40  
41

### 42 **Testing Apparatus**

43 Tests were conducted as described by Hutten[12]. An airtight apparatus allowed simultaneous  
44 testing of unfiltered and filtered air. Ambient particle levels were raised by aerosolizing NaCl  
45 with a Pari Pro Plus, Vios, United States, 312F83-LC+ nebulizer, with a total output rate of 590  
46 mg/min. A 2.5 cm diameter tube provided access to two ultrafine particle counters (P-Trak, TSI,  
47 United States, model 8525) which measured concentrations of particles between 0.02 and 0.1  
48  $\mu\text{m}$ . Most respiratory viruses of concern fall in this size range including influenza, SARS, SARS-  
49 CoV-2. Indeed, analysis of viral particle sizes in individuals with respiratory infections suggest  
50 transmission through small particle aerosols, rather than through large droplets, is the rule rather  
51 than the exception[13].  
52  
53  
54  
55  
56  
57  
58  
59  
60

1  
2  
3 The testing apparatus held a 2.5 cm diameter sample of the filter material. Material was allowed  
4 to relax on a flat surface and the testing mount placed on top, with excess material secured by an  
5 adjustable clip. See Figure 1 for an illustration of the testing apparatus.  
6

7  
8 After mounting a new specimen, a minimum of three minutes loading time at high velocity was  
9 given. At least thirty seconds between sequential tests on a previously loaded material was  
10 given.  
11

12 Probes for the velocity meter and particle counters were inserted halfway into the tube. Flexible  
13 sealant was used around the entry points of the probes to prevent air leakage.  
14  
15

#### 16 17 FIGURE 1 HERE

18 *Figure 1: Diagram of experimental apparatus using two P-Trak Ultrafine Particle 8525 counters*  
19 *for simultaneous measurement and a TSI 9565 VelociCalc to measure face velocity.*  
20

21  
22 Airflow was controlled through suction, which pulled air through the filter medium at a rate of  
23 approximately 16.5 m/s. This target number was chosen as a median between the average face  
24 velocity (11.2 m/s) and greatest face velocity (22 m/s) recorded in a study on saliva droplet  
25 transport by adult coughing[7]. Face velocity represents the speed of the particles when leaving  
26 the mouth. The chosen velocity was also in line with the 15.3 m/s average initial coughing  
27 velocity of an adult male measured in a 2012 study[14]. Velocity was measured with VelociCalc  
28 Ventilation Meter, TSI, United States, model 9565.  
29

30  
31 Prior to conducting high velocity tests, calibration tests were performed to validate the testing  
32 apparatus at lower velocities. Five control tests at lower velocity (face velocity between 5.5-7.5  
33 m/s) showed the N95 performance averaging 89% with a high of 93%. A high-quality PM 2.5  
34 filter showed an average FE of 89% and a high of 90%.  
35

#### 36 37 **Calculating Filtration Efficiency**

38 Filtration efficiency represents the percent of particles a filter medium can block. Hutten's  
39 formula was used to assess filtration efficiency (FE).  
40

$$41 \quad FE = \frac{(Upstream\ Particle\ Count - Downstream\ Particle\ Count) \times 100}{42 \quad Upstream\ Particle\ Count}$$

43

44  
45 For each material or material combination, ten sets of readings were collected. Readings were  
46 collected using two P-Trak Ultrafine Particle Counters, Model 8525. Each reading was collected  
47 as a 10-second average of ultrafine air particle concentrations. The average filtration efficiency  
48 for each material was calculated. Due to the number of readings collected, the 95% confidence  
49 intervals for error bars was calculated using the appropriate *t* distribution critical value.  
50

#### 51 52 53 **Breathing Resistance**

54 To estimate the breathing resistance of each material, and thus their suitability for use in a face  
55 mask, two members of the team tested the breathing resistance of each material. The sample  
56  
57  
58  
59

holder (see figure 1), which allowed airflow only through a 1” diameter of the selected material, was held tightly to the mouth so all respiration occurred through the sample. Before evaluating materials, testers first breathed through an empty sample holder to feel a lack of resistance. Testers then breathed for 20 to 40 seconds through each held sample first while breathing normally and then while breathing quickly and heavily. Each fabric was scored on a 0-3 scale where 3 represented a great difficulty in drawing breath, 2 represented that there was noticeable resistance, but breath could be drawn, 1 represented minor limitation but relative ease of breathing, and 0 represented no noticeable hindrance. There was very high agreement between the two testers (over 97%) and any disagreement was easily settled by discussion. Combining and layering fabric was not found to significantly increase the breathing difficulty. All face mask fabric combinations scored 1 or 2.

### Damp Testing

Dampness was achieved by applying 7 milliliters of filtered water, the approximate amount of water exhaled by an adult during an hour of respiration[15], to the 5 cm square section of the material.

### Note on Study Design and Limitations

It should be noted that, due to the limitations imposed by this outbreak, this study was done with available materials. Data from this study should be treated as preliminary and used to inform decisions about filtration media only in relation to existing studies which assess viral filtration through the collection of viral cultures.

Ten readings were taken for each material, although one reading for the disposable HEPA vacuum bag had to be later discarded due to a data transfer error. At least two different sections of each type of fabric were tested to ensure accurate representation of the material. Zero readings were taken on the particle testers regularly to ensure proper functioning.

## RESULTS

### Materials

All materials blocked some ultrafine particles (see Figure 2). A 3M N95 mask and hospital-grade surgical mask were tested for the sake of comparison. Two types of vacuum bag, a disposable HEPA vacuum bag and a washable HEPA vacuum bag, were evaluated due to the number of people attempting to utilize these materials as face mask filters. Eighteen fabrics were tested as a single layer. Lastly, fabrics were layered to represent potential mask designs. For this test, fusible interfacing was heat bonded to another layer.

FIGURE 2 HERE

*Figure 2: The filtration efficiency of tested fabrics and fabric combinations with error bars showing 95% confidence.*

HEPA vacuum bags blocked the most ultrafine particles, with the N95 mask from 3M blocking the second greatest percentage of particles.



1  
2  
3  
4 Repurposing HEPA filters holds great promise for emergency face masks; however, great care  
5 should be taken that the component materials within the filter do not pose dangers to those  
6 making or wearing the face mask. While the single-use HEPA vacuum bag tested showed the  
7 greatest ability to filter ultrafine particles, the layers fell apart when the material was cut,  
8 exposing inner layers of the fabric. Vacuum bags may have component materials which are  
9 effective at filtering particles but which are unsafe to inhale or come into close contact with the  
10 face. The reusable, washable HEPA bags had a construction more suitable to creating  
11 emergency face masks as the material held together well and did not expose inner fibers, but the  
12 safety of the materials used are also unknown.  
13  
14

15  
16 The filtration efficiencies of select materials were tested when damp (see Figure 3). Only minor  
17 differences in filtration efficiency were noted for quilting cotton, cotton flannel, and craft felt.  
18 Denim showed a significant decrease in efficiency while the HEPA single-use vacuum bags  
19 showed an increase in efficiency when damp.  
20

21  
22 Figure 3 also provides breathing resistance, fabric composition, FE, and standard deviation. The  
23 most suitable fabrics for face masks are those with a high FE but low breathing resistance.  
24 Denim jeans and windbreaker fabric blocked a high proportion of ultrafine particles but were  
25 extremely difficult to breathe through (see Figure 3). The windbreaker fabric may be suited to a  
26 loose-fitting face mask which protects the wearer from liquid droplets or splashes but is  
27 unsuitable for filtration.  
28

29  
30 Suitable materials which showed high filtration efficiency and low breathing resistance included  
31 felted wool, quilting cotton, and cotton flannel. A single sock held flat compared well with the  
32 quilting cotton and, when pressed tight against the nose and mouth, may provide emergency  
33 protection.  
34  
35

### 36 **Nonwoven Fusible Interfacing**

37  
38 Nonwoven fusible interfacing, the kind used for stiffening collars and other areas in garments,  
39 was able to significantly improve the ability of the fabrics to filter ultrafine particles without  
40 increasing breathing resistance. Of particular note, we found that brands exhibited significant  
41 differences in filtering performance. HTC brand lightweight interfacing was more effective than  
42 Heat-n-Bond brand lightweight interfacing. Applying two layers of the Heat-n-Bond achieved  
43 similar improvements to filtration efficiency as the HTC brand. Wonder Under, a double sided,  
44 heavyweight fusible interfacing for constructing bags and craft projects, showed similar filtration  
45 ability to the HTC brand but may be too stiff to be suitable for face mask design.  
46  
47

### 48 **Material Combinations**

49  
50 When layered to create potential face mask configurations, common fabrics were able to achieve  
51 much higher levels of ultrafine particle filtration (see Figure 2). Some material combinations  
52 were able to filter out higher percentages of ultrafine particles than the surgical or N95 masks  
53 tested, although this should not be taken to mean they provide higher levels of protection from  
54 viruses. All fabric combinations scored between a 2 and 3 on the breathing resistance test,  
55 indicating they were more difficult to breathe through than an N95 mask.  
56  
57  
58  
59

## FIGURE 3 HERE

*Figure 3: Chart of materials composition, breathing resistance, mean FE, standard deviation of FE, and, where available, FE when damp.*

## DISCUSSION

Our data suggests that, in times of severe supply shortage, common fabrics can be layered to create face masks which protect wearers and others from a significant percentage of ultrafine particles. It should not be inferred that these layered fabrics can protect wearers from more viral particles than N95 masks or surgical masks as our study did not discriminate between viral particles and other ultrafine particles. Many viruses are carried on droplets or other particles significantly larger than those in tested here. Furthermore, these results do not incorporate the challenges of achieving fit, a critical factor of face mask design. The benefit of using materials which offer high filtration efficiency are likely to be significantly reduced or negated if the mask is worn with a poor fit.

Many viruses are carried on droplets or other particles significantly larger than those in tested here. Previous studies have shown that large particles are more readily filtered[3,4] than smaller particles, indicating that a study of ultrafine particles will lead to a low 'baseline', upon which filtration efficiency of larger particles will increase. Moreover, ultrafine particles tend to pose high risks during other emergency situations when fabric face masks are needed, such as forest fire outbreaks and times of high, concentrated pollution.

### The Effect of Velocity on Filtration Efficiency

The flow rate of air used in this study represents the velocity of air expelled during human coughing[7] and is the first such study to evaluate fabric filtration under high velocities. A velocity of 16.5 m/s or 1650 cm/s was chosen to represent the face velocity of an adult coughing[7]. N95 filtration efficiency of NaCl was seen to decrease with velocity in prior filtration studies, from 99% in Rengasamy et al's evaluation at 0.165 m/s to 85% in Konda et al's evaluation at 0.26 m/s. As the velocity was up to 100 times greater than Rengasamy et al's and 63 times greater than Konda et al's, filtration efficiency was expected to be significantly lower if velocity impacts filtration efficiency. Our results support the idea that velocity has a significant impact on filtration efficiency.

Popular mask filtration which specify a face velocity include FDA-PFE, and ASTM-PFE and utilize velocities ranging from 0.5 to 25 cm/sec. Several testing methods do not specify a face velocity but instead provide flow rate for particle generation. While face velocity cannot be derived from flow rate, the flow rates utilized in these methods of 85 L/min in the NIOSHE NaCl test and 28.3 L/min in the ASTM-BFE test are lower than Konda et al's upper flow rate of 90 L/min, which corresponded to a face velocity of 0.26 m/s.

No prior studies have evaluated the ability of N95 face masks to filter particles at such high face velocities which can be used as a direct comparison. Rangasamy's 2015 study on synthetic blood penetration of N95 masks found that the number of respirator samples which failed the blood penetration test increased with increasing test velocities[10]. This, along with our findings, indicates a strong need to further evaluate mask filtration at high velocities. While a leak around the downstream testing port could lead to a lowered particle count, the possibility of low performance at high velocities should be eliminated through further study.

### Comparing Fabric Filtration Efficiency

Although the results from higher velocity tests are significantly lower than previous tests, the relationship between the efficiency of the tested materials remains highly consistent with prior studies. The average velocity used in prior studies is 0.20 m/s, which is 82.5% of the velocity used in the prior study. When the values for high velocity filtration are increased by 82.5%, the data compares closely with data from previous research. Figure 4 compares data from studies which examine fabric filtration. Where applicable, the data chosen represented similar particle size filtration and the highest velocities offered. It should be noted that each test utilizes different methods of testing filtration efficiency and different brands of materials. Konda et al applies a maximum face velocity of 0.26 m/s utilizing NaCL aerosol (approximately 0.74  $\mu\text{m}$ ). Rangasamy et al similarly uses aerosolized NaCL at the lowest face velocity of 0.165 m/s. Davies et al assesses the filtration of Bacteriophage MS2 (0.023  $\mu\text{m}$ ) at a face velocity of 0.2 m/s. Despite the differences in testing method, velocities used, and differences in product brands, the compiled data shows close groupings of filtration efficiency. Data on T-Shirt filtration in the present study is presented for both the lightweight and heavyweight t-Shirt.

#### FIGURE 4 HERE

*Figure 4: A comparison of existing data on fabric ultrafine filtration. Data chosen represents the highest velocity for each study. Data from this study was adjusted to proportionally represent a velocity of 0.2 m/s for this comparison. Data from Rangasamy et al is estimated from the included graphs, as statistical information about the data was not provided.*

A comparison showed that no one study method consistently produced the highest results. Konda, who recorded the highest fabric FE also recorded the lowest FE for N95 and surgical masks. Surprisingly, Rangasamy et al's data does not closely resemble Konda et al's, although both studies compared NaCL filtration. This may be a factor of the Konda et al's filtration studied at a greater velocity than Rangasamy et al uses, another indication for the importance of velocity on filtration. Our FE for fabric was frequently lower than others, a fact which may be accounted for with our single wash of the material before testing[11] and provide further evidence that washing fabric masks reduces their filtration efficiency.

### Safety Considerations

It is suggested homemade face masks should not be used in place of other protective measures such as self-isolation or social distancing. Rather, our results suggest homemade face masks may be a viable protective measure for those who cannot remain isolated and cannot obtain commercial face masks.

1  
2  
3  
4 Repurposing material for homemade face masks comes with its own risks. Consideration should  
5 be given to respiratory hazards which may arise from the material used to construct a homemade  
6 face mask. For example, concern has been expressed that certain HEPA vacuum bags include  
7 fibers which, if inhaled, can cause lung injury. Lint and fibers from fabric, when inhaled in large  
8 quantities, and known to contribute to multiple lung problems including asthma, byssinosis, and  
9 bronchitis. For this reason, we would caution those needing to create homemade face masks to  
10 ensure all material is safe, nontoxic and lint-free. Fabrics which readily shed fibers may not be  
11 suited for face mask design. The risks associated with such materials are an important area of  
12 further study, as large numbers of people are currently creating, wearing, washing, distributing,  
13 and selling homemade face masks. Further research should further evaluate the ability of these  
14 materials and material combinations to filter specific viruses, pollutants, and other harmful  
15 airborne particles. Additional research on homemade face mask fit and fit testing is also critical  
16 at this time.  
17  
18  
19

20 It is our hope that this study can assist home sewers and makers to create the best face mask  
21 possible when standardized commercial personal protective equipment is unavailable. Our study  
22 shows face masks can be created from common fabrics to provide wearers with significant  
23 protection from ultrafine particles. Until further research can establish the safety and viral  
24 filtration of fabric face masks, we suggest the use of approved respiratory protection whenever  
25 possible and the use of homemade face masks only when these products are unavailable.  
26  
27

28 It should be noted that the results of this study may also inform emergency mask creation in  
29 response to environmental emergencies where ultrafine particle levels are particularly dangerous,  
30 such as in the case of smoke or smog. Repeated face mask shortages during the California  
31 wildfires over the past few years have illustrated the recurring need for scientific data to guide  
32 the design of homemade face masks when commercial supply chains are unable to meet demand.  
33  
34  
35

## 36 REFERENCES

- 37 1. What Countries Require Masks in Public [Internet]. #Masks4All. Available from:  
38 <https://masks4all.co/what-countries-require-masks-in-public/>
- 39 2. Davies A, Thompson KA, Giri K, Kafatos G, Walker J, Bennett A. Testing the efficacy of  
40 homemade masks: would they protect in an influenza pandemic? *Disaster Med Public*  
41 *Health Prep.* 2013;7(4):413–8.
- 42 3. Konda A, Prakash A, Moss GA, Schmoldt M, Grant GD, Guha S. Aerosol Filtration  
43 Efficiency of Common Fabrics Used in Respiratory Cloth Masks. *ACS Nano.* 2020;
- 44 4. Rengasamy S, Eimer B, Shaffer RE. Simple respiratory protection - Evaluation of the  
45 filtration performance of cloth masks and common fabric materials against 20-1000 nm  
46 size particles. *Ann Occup Hyg.* 2010;54(7):789–98.
- 47 5. National Centers for Disease Control and Prevention. Use of Cloth Face Coverings to  
48 Help Slow the Spread of COVID-19 [Internet]. 2020. Available from:  
49 [https://www.cdc.gov/coronavirus/2019-ncov/prevent-getting-sick/diy-cloth-face-](https://www.cdc.gov/coronavirus/2019-ncov/prevent-getting-sick/diy-cloth-face-coverings.html)  
50 [coverings.html](https://www.cdc.gov/coronavirus/2019-ncov/prevent-getting-sick/diy-cloth-face-coverings.html)  
51  
52  
53  
54  
55  
56  
57  
58  
59

6. National Centers for Disease Control and Prevention. Strategies for Optimizing the Supply of Face masks [Internet]. 2010. Available from: <https://www.cdc.gov/coronavirus/2019-ncov/hcp/ppe-strategy/face-masks.html>
7. Zhu SW, Kato S, Yang JH. Study on transport characteristics of saliva droplets produced by coughing in a calm indoor environment. *Build Environ*. 2006;41(12):1691–702.
8. Tang JW, Nicolle AD, Klettner CA, Pantelic J, Wang L, Suhaimi A Bin, et al. Airflow Dynamics of Human Jets: Sneezing and Breathing - Potential Sources of Infectious Aerosols. *PLoS One*. 2013;8(4):1–7.
9. Delft University of Technology. Project Mask [Internet]. Delft, Netherlands: YouTube; 2020. Available from: <https://www.youtube.com/watch?v=i968cqeWyyY>
10. Rengasamy S, Sbarra D, Nwoko J, Shaffer R. Resistance to synthetic blood penetration of National Institute for Occupational Safety and Health-approved N95 filtering facepiece respirators and surgical N95 respirators. *Am J Infect Control* [Internet]. 2015;43(11):1190–6. Available from: <http://dx.doi.org/10.1016/j.ajic.2015.06.014>
11. Neupane BB, Mainali S, Sharma A, Giri B. Optical microscopic study of surface morphology and filtering efficiency of face masks. *Peer J*. 2019;
12. Hutten IM. *Handbook of Nonwoven Filter Media*. 2nd ed. Butterworth-Heinemann; 2015. 343–408 p.
13. Fennelly KP. Particle sizes of infectious aerosols: implications for infection control. *Lancet Respir Med* 2020;2600(20):1–11. Available from: [http://dx.doi.org/10.1016/S2213-2600\(20\)30323-4](http://dx.doi.org/10.1016/S2213-2600(20)30323-4)
14. Kwon SB, Park J, Jang J, Cho Y, Park DS, Kim C, et al. Study on the initial velocity distribution of exhaled air from coughing and speaking. *Chemosphere* [Internet]. 2012;87(11):1260–4. Available from: <http://dx.doi.org/10.1016/j.chemosphere.2012.01.032>
15. Zieliński J, Przybylski J. How much water is lost during breathing? *Pneumonol Alergol Pol* [Internet]. 2012;80(4):339–42. Available from: <http://www.ncbi.nlm.nih.gov/pubmed/22714078>

~ ~ ~

## AUTHOR'S CONTRIBUTIONS

### **Eugenia O'Kelly**

Conceived of the study, developed study methodology, obtained study materials and testing apparatus, collected study data, wrote manuscript

### **Sophia Pirog**

Obtained study materials, analyzed data and performed calculations, designed graphs, edited manuscript

### **James Ward**

Developed study methodology, reviewed data, edited manuscript, supervised study

### **John Clarkson**

Developed study methodology, reviewed data, edited manuscript, supervised study

## AWKNOWLEDGMENTS

The authors would like to thank Corinne E. O'Kelly for supporting this research. We would also like to thank the many sewers, doctors, and designers who spoke with us about their needs and concerns.

## CONFLICT OF INTEREST / COMPETING INTERESTS

There are no conflicts of interests/competing interests for any of the paper's contributing authors.

## DATA STATEMENT

Data from this study is freely available under a CC BY license on Cambridge University's Apollo data repository.

**Link:** <https://doi.org/10.17863/CAM.51390>

**Citation:** O'Kelly, E., The Ability of Common Fabrics to Filter Ultrafine Particles [Data file]. Cambridge University: Cambridge, United Kingdom; 2020. <https://doi.org/10.17863/CAM.51390>

## FUNDING

This research received no specific grant from any funding agency in the public, commercial or not-for-profit sectors.



Figure 1: Diagram of experimental apparatus using two P-Trak Ultrafine Particle 8525 counters for simultaneous measurement and a TSI 9565 VelociCalc to measure face velocity.

1267x904mm (72 x 72 DPI)



Figure 2: The filtration efficiency of tested fabrics and fabric combinations with error bars showing 95% confidence.

274x211mm (72 x 72 DPI)



| Fabric                      | Brand         | Fiber Composition         | Ease of Breathing Through Material | Dry       |       | Damp      |       |
|-----------------------------|---------------|---------------------------|------------------------------------|-----------|-------|-----------|-------|
|                             |               |                           |                                    | Mean % FE | SD    | Mean % FE | SD    |
| N95 Mask                    | 3M            | N/A                       | 1                                  | 52.47     | 2.222 | 45.68     | 1.247 |
| Surgical Mask               |               | N/A                       | 2                                  | 47.46     | 1.087 | 42.73     | 1.664 |
| Disposable HEPA Vacuum Bags | Kenmore       | N/A                       | 2                                  | 60.86     | 0.761 | 71.93     | 4.407 |
| Windbreaker                 |               | 100% Polyester            | 3                                  | 47.12     | 1.332 | 45.55     | 3.535 |
| Jeans Denim                 |               | 100% Cotton               | 3                                  | 45.94     | 2.176 | 30.69     | 5.314 |
| Washable Vacuum Bag HEPA    | CanineCoddler | N/A                       | 2                                  | 43.64     | 1.852 | 44.97     | 2.267 |
| Thick felted wool           | Weir Crafts   | 100% Merino Wool          | 0                                  | 35.87     | 0.502 |           |       |
| Cotton, Heavyweight Woven   |               | 100% Cotton               | 2                                  | 35.77     | 2.707 |           |       |
| Folded Sock                 |               | Cotton, Lycra             | 2                                  | 35.36     | 1.146 |           |       |
| Quilting Cotton             |               | 100% Cotton               | 1                                  | 34.54     | 2.047 | 31.88     | 1.406 |
| Two Sided Minky Fabric      |               | N/A                       | 1                                  | 34.17     | 0.716 |           |       |
| Shirting Cotton             |               | 100% Cotton               | 1                                  | 33.59     | 2.097 |           |       |
| Cotton, Lightweight Woven   |               | 100% Cotton               | 0                                  | 30.20     | 1.499 |           |       |
| Cotton Quilt Batting        |               | 100% Cotton               | 0                                  | 29.81     | 1.270 |           |       |
| Cotton Flannel              |               | 100% Cotton               | 1                                  | 28.50     | 1.529 | 30.14     | 1.196 |
| Craft Felt                  | Misscrafts    | Rayon, Acrylic, Polyester | 0                                  | 27.72     | 0.748 |           |       |
| 100% Nylon Woven            |               | 100% Nylon                | 3                                  | 27.61     | 1.303 |           |       |
| T-Shirt, Heavyweight        | Gildan        | 100% Cotton               | 1                                  | 25.21     | 0.471 |           |       |
| Cotton Jersey Knit          |               | 100% Cotton               | 0                                  | 24.56     | 4.800 |           |       |
| Lycra                       |               | 82% Nylon, 18% Spandex    | 0                                  | 21.60     | 1.477 |           |       |
| Fusible Interfacing         | HTC           | N/A                       | 0                                  | 15.00     | 1.672 |           |       |
| T-Shirt, Lightweight        | Retro Brant   | 50% Polyester, 50% Cotton | 0                                  | 10.50     | 1.293 |           |       |

1  
2  
3  
4  
5  
6  
7  
8  
9  
10  
11  
12  
13  
14  
15  
16  
17  
18  
19  
20  
21  
22  
23  
24  
25  
26  
27  
28  
29  
30  
31  
32  
33  
34  
35  
36  
37  
38  
39  
40  
41  
42  
43  
44  
45  
46  
47  
48  
49  
50  
51  
52  
53  
54  
55  
56  
57  
58  
59  
60



Figure 4: A comparison of existing data on fabric ultrafine filtration. Data chosen represents the highest velocity for each study. Data from this study was adjusted to proportionally represent a velocity of 0.2 m/s for this comparison. Data from Rengasamy et al is estimated from the included graphs, as statistical information about the data was not provided.

282x208mm (72 x 72 DPI)

# BMJ Open

## Ability of Fabric Facemasks Materials to Filter Ultrafine Particles at Coughing Velocity

|                                 |                                                                                                                                                                                                                                                         |
|---------------------------------|---------------------------------------------------------------------------------------------------------------------------------------------------------------------------------------------------------------------------------------------------------|
| Journal:                        | <i>BMJ Open</i>                                                                                                                                                                                                                                         |
| Manuscript ID                   | bmjopen-2020-039424.R3                                                                                                                                                                                                                                  |
| Article Type:                   | Original research                                                                                                                                                                                                                                       |
| Date Submitted by the Author:   | 19-Aug-2020                                                                                                                                                                                                                                             |
| Complete List of Authors:       | O'Kelly, Eugenia; University of Cambridge, Department of Engineering<br>Pirog, Sophia; Northwestern University<br>Ward, James; University of Cambridge, Department of Engineering<br>Clarkson, John; University of Cambridge, Engineering Design Centre |
| <b>Primary Subject Heading</b>: | Public health                                                                                                                                                                                                                                           |
| Secondary Subject Heading:      | Occupational and environmental medicine, Infectious diseases                                                                                                                                                                                            |
| Keywords:                       | Public health < INFECTIOUS DISEASES, Infection control < INFECTIOUS DISEASES, PUBLIC HEALTH, Respiratory infections < THORACIC MEDICINE, INFECTIOUS DISEASES                                                                                            |
|                                 |                                                                                                                                                                                                                                                         |

SCHOLARONE™  
Manuscripts



I, the Submitting Author has the right to grant and does grant on behalf of all authors of the Work (as defined in the below author licence), an exclusive licence and/or a non-exclusive licence for contributions from authors who are: i) UK Crown employees; ii) where BMJ has agreed a CC-BY licence shall apply, and/or iii) in accordance with the terms applicable for US Federal Government officers or employees acting as part of their official duties; on a worldwide, perpetual, irrevocable, royalty-free basis to BMJ Publishing Group Ltd ("BMJ") its licensees and where the relevant Journal is co-owned by BMJ to the co-owners of the Journal, to publish the Work in this journal and any other BMJ products and to exploit all rights, as set out in our [licence](#).

The Submitting Author accepts and understands that any supply made under these terms is made by BMJ to the Submitting Author unless you are acting as an employee on behalf of your employer or a postgraduate student of an affiliated institution which is paying any applicable article publishing charge ("APC") for Open Access articles. Where the Submitting Author wishes to make the Work available on an Open Access basis (and intends to pay the relevant APC), the terms of reuse of such Open Access shall be governed by a Creative Commons licence – details of these licences and which [Creative Commons](#) licence will apply to this Work are set out in our licence referred to above.

Other than as permitted in any relevant BMJ Author's Self Archiving Policies, I confirm this Work has not been accepted for publication elsewhere, is not being considered for publication elsewhere and does not duplicate material already published. I confirm all authors consent to publication of this Work and authorise the granting of this licence.

## Ability of Fabric Face Masks Materials to Filter Ultrafine Particles at Coughing Velocity

### AUTHORS

Eugenia O’Kelly, Department of Engineering, University of Cambridge – currently in San Francisco, USA  
Orchid ID: 0000-0002-4748-3957

Sophia Pirog, Department of Medical Social Sciences, Northwestern University – Chicago, USA  
Orchid ID: 0000-0003-3422-4304

James Ward, Department of Engineering, University of Cambridge – Cambridge, UK  
Orchid ID: 0000-0002-0362-4711

P. John Clarkson, Department of Engineering, University of Cambridge – Cambridge, UK  
Orchid ID: 0000-0001-8018-7706

### CORRESPONDING AUTHOR ADDRESS

Eugenia O’Kelly

999 Green St, Apt 1505  
San Francisco, California  
94133  
USA

Phone: 1-415-359-0092  
Fax: 1-415-520-6460  
E-mail: [eo339@cam.ac.uk](mailto:eo339@cam.ac.uk)

### WORD COUNT

3,530

## ABSTRACT

### Objectives:

We examined the ability of fabrics which might be used to create homemade face masks to filter out ultrafine (0.02  $\mu\text{m}$  - 0.1 $\mu\text{m}$ ) particles at the velocity of adult human coughing.

### Method:

Twenty commonly available fabrics and materials were evaluated for their ability to reduce air concentrations of ultrafine particles at a coughing face velocities. Further assessment was made on the filtration ability of selected fabrics while damp and of fabric combinations which might be used to construct homemade masks.

### Results:

Single fabric layers blocked a range of ultrafine particles. When fabrics were layered, a higher percentage of ultrafine particles were filtered. The average filtration efficiency of single layer fabrics and average layered combination was found to be 35 and 45%, respectively. Nonwoven fusible interfacing, when combined with other fabrics, could add up to 11% additional filtration efficiency. However, fabric and fabric combinations were more difficult to breathe through than N95 masks.

### Conclusions:

The current coronavirus pandemic has left many communities without access to N95 face masks. Our findings suggest that face masks made from layered common fabric can help filter ultrafine particles and provide some protection for the wearer when commercial face masks are unavailable.

## KEYWORDS

SARS-CoV-2, Coronavirus, Infection Control, Respiratory Infections, Face mask, Public Health, Infectious Disease, PPE

## STRENGTHS AND LIMITATIONS OF THIS STUDY

- Tested a large number of potential face mask materials, including materials currently in common use such as Lycra which have not been previously tested
- Evaluated filtration efficiency at coughing velocities, more closely mimicking use-case of masks worn for community protection than previous studies
- Assess the data from prior published work and current study, creating a picture of Filtration Efficiency and the impact of velocity
- Did not discriminate between pathogenic and non-pathogenic particles
- Breathing resistance was estimated based on qualitative feedback

## Ability of Fabric Face Masks Materials to Filter Ultrafine Particles at Coughing Velocity

### INTRODUCTION

The current SARS-CoV-2 outbreak has left many communities without sufficient quantities of face masks for the protection of medical staff and first responders, let alone sufficient quantities of masks for the general population's use. Policies requiring or requesting individuals to wear face masks when they leave their homes have been implemented in most governmental regions throughout the world, with over 180 countries specifically recommend wearing face masks at the time this article was written[1].

Homemade face masks have now become a necessity for many to both meet the demands that cannot be met by supply chains and/or to provide more affordable options. Although widespread online resources are available to help home sewers and makers create masks, scientific guidance on the most suitable materials is currently limited.

Though not as effective as surgical masks or respirators, homemade face masks have been shown to provide benefit in filtering viral and bacterial particles[2-4]. The primary purpose of face masks worn by the general public is to limit the spread of viral particles from respiratory activity, rather than blocking the inhalation of any contagious particles[5]. For the protection of the face-mask wearer, the Center for Disease Control specifically recommends fabric face masks for the purpose of limiting viral spread through respiratory droplet[5,6]. Face masks worn for the protection of others must efficiently filter particles emitted while coughing, when large amounts of potentially infectious respiratory droplets are produced.

Prior studies evaluating the efficacy of fabric face masks have tested their filtration ability under velocities representative of normal to active breathing[2-4]. Significantly more potentially infectious particles are generated and spread by coughing, which occurs at velocities up to 100 times greater than those tested in previous experiments[7,8]. This study evaluates the effectiveness of fabrics to filter ultrafine particles at velocities representative of adult coughing. Although no previous studies have evaluated the ability of face masks to filter particles at high velocities, evidence suggested high velocities may significantly decrease the efficacy of face mask materials[9,10].

Furthermore, past studies have tested a limited set of similar materials, namely t-shirts, sweatshirts, scarves, and tea towels[2-4]. Communicating with the international community of home sewers and small businesses seeking to design face masks, we determined a need for the assessment of a much wider range of fabric types, including stretch fabrics, felts, wool, and nylon. Some fabrics, such as stretch Lyrics and nylon, are in frequent use in commercial and homemade face masks but have not been evaluated for filtration efficiency. Conversations with material scientists and sewers highlighted the need to consider the possible benefits of nonwoven interfacing, a material not previously tested for filtration.

Finally, our study assesses the impact of moisture, an effect of respiration, on filtration efficiency. A selection of fabrics was tested when damp to simulate dampness from sweat or heavy respiration. Furthermore, as fabric face masks are often washed and re-worn, we tested all

1  
2  
3 materials after subjecting them to one cycle in a home laundry machine. The literature  
4 evaluating the impact of washing and drying of fabric face masks is limited. One study on one  
5 fabric face mask showed a decrease in filtration efficiency with washing[11]. All fabric materials  
6 were tested after one wash and dry in a home machine.  
7

8  
9 Both individual materials and material combinations were tested with the goal of increasing  
10 particle filtration of homemade masks.  
11

## 12 13 **METHODS**

14  
15  
16 This study was conducted in response to the rapidly growing SARS-CoV-2 outbreak. As such,  
17 priority was given to developing a test apparatus which could be constructed and provide usable  
18 results in a short amount of time.  
19

### 20 **Patient and Public Involvement**

21 The research team communicated closely with home sewers, small businesses branching out to  
22 include fabric face mask manufactures, and physicians interested in protecting at-risk patients  
23 when masks were not available. Our conversations highlighted a need for filtration information  
24 on a wider variety of materials than those assessed in previous studies. We studied a range of  
25 materials that were previously unexamined in the literature, but of high interest to the  
26 aforementioned communities. These included: felt, Lycra, felts, washable vacuum bags, and quilt  
27 batting/wadding. Materials for investigation were selected based on those that home sewers  
28 reported as being readily available. Responding to home sewers' understanding of fabric  
29 categories and the success of cotton in prior research[2-4], we also tested various weaves of  
30 cotton commonly available, including quilting cotton, shirting cotton, and cotton jersey knit.  
31  
32  
33

34 The physician and home sewing communities raised concerns regarding the risks of infection by  
35 reusing masks. In response to this, preference was given to materials which could be cleaned in  
36 a home washing machine and/or dryer at its hottest setting. All materials were washed and dried  
37 before testing. This caused significant shrinkage of wool felt. In response to further concerns  
38 about efficacy when damp, top-performing materials were subjected to five additional tests when  
39 damp.  
40  
41

### 42 **Testing Apparatus**

43 Tests were conducted as described by Hutten[12]. An airtight apparatus allowed simultaneous  
44 testing of unfiltered and filtered air. The aerosol particles were generated by nebulizing NaCl with a  
45 nebulizer (Pari Pro Plus, Vios, United States, 312F83-LC+) at the total output rate of 590 mg/min.

46 A 2.5 cm diameter tube provided access to two ultrafine particle counters (P-Trak, TSI, United  
47 States, model 8525) which measured concentrations of particles between 0.02 and 0.1  $\mu\text{m}$ . Most  
48 respiratory viruses of concern fall in this size range including influenza, SARS, SARS-CoV-2.  
49 Indeed, analysis of viral particle sizes in individuals with respiratory infections suggest  
50 transmission through small particle aerosols, rather than through large droplets, is the rule rather  
51 than the exception[13].  
52  
53  
54  
55  
56  
57  
58  
59  
60



1  
2  
3 The testing apparatus held a 2.5 cm diameter sample of the filter material. Material was allowed  
4 to relax on a flat surface and the testing mount placed on top, with excess material secured by an  
5 adjustable clip. See Figure 1 for an illustration of the testing apparatus.  
6

7  
8 After mounting a new specimen, a minimum of three minutes loading time at high velocity was  
9 given. At least thirty seconds between sequential tests on a previously loaded material was  
10 given.  
11

12 Probes for the velocity meter and particle counters were inserted halfway into the tube. Flexible  
13 sealant was used around the entry points of the probes to prevent air leakage.  
14  
15

#### 16 17 FIGURE 1 HERE

18 *Figure 1: Diagram of experimental apparatus using two P-Trak Ultrafine Particle 8525 counters*  
19 *for simultaneous measurement and a TSI 9565 VelociCalc to measure face velocity.*  
20

21  
22 Airflow was controlled through suction, which pulled air through the filter medium at a rate of  
23 approximately 16.5 m/s. This target number was chosen as a median between the average face  
24 velocity (11.2 m/s) and greatest face velocity (22 m/s) recorded in a study on saliva droplet  
25 transport by adult coughing[7]. Face velocity represents the speed of the particles when leaving  
26 the mouth. The chosen velocity was also in line with the 15.3 m/s average initial coughing  
27 velocity of an adult male measured in a 2012 study[14]. Velocity was measured with VelociCalc  
28 Ventilation Meter (TSI, United States, model 9565).  
29

30  
31 Prior to conducting high velocity tests, calibration tests were performed to validate the testing  
32 apparatus at lower velocities. Five control tests at lower velocity (face velocity between 5.5-7.5  
33 m/s) showed the N95 performance averaging 89% with a high of 93%. A high-quality PM 2.5  
34 filter showed an average FE of 89% and a high of 90%.  
35

#### 36 **Calculating Filtration Efficiency**

37 Filtration efficiency represents the percent of particles a filter medium can block. Hutten's  
38 formula was used to assess filtration efficiency (FE).  
39

$$40 \quad FE = \frac{(Upstream Particle Count - Downstream Particle Count) \times 100}{41 \quad Upstream Particle Count}$$

42  
43  
44 For each material or material combination, ten sets of readings were collected. Readings were  
45 collected using two P-Trak Ultrafine Particle Counters, Model 8525. Each reading was collected  
46 as a 10-second average of ultrafine air particle concentrations. The average filtration efficiency  
47 for each material was calculated. Due to the number of readings collected, the 95% confidence  
48 intervals for error bars was calculated using the appropriate *t* distribution critical value.  
49  
50

#### 51 52 **Breathing Resistance**

53 To estimate the breathing resistance of each material, and thus their suitability for use in a face  
54 mask, two members of the team tested the breathing resistance of each material. The sample  
55  
56  
57  
58  
59  
60

holder (see figure 1), which allowed airflow only through a 1” diameter of the selected material, was held tightly to the mouth so all respiration occurred through the sample. Before evaluating materials, testers first breathed through an empty sample holder to feel a lack of resistance. Testers then breathed for 20 to 40 seconds through each held sample first while breathing normally and then while breathing quickly and heavily. Each fabric was scored on a 0-3 scale where 3 represented a great difficulty in drawing breath, 2 represented that there was noticeable resistance, but breath could be drawn, 1 represented minor limitation but relative ease of breathing, and 0 represented no noticeable hindrance. There was very high agreement between the two testers (over 97%) and any disagreement was easily settled by discussion. Combining and layering fabric was not found to significantly increase the breathing difficulty. All face mask fabric combinations scored 1 or 2.

### Damp Testing

Dampness was achieved by applying 7 milliliters of filtered water, the approximate amount of water exhaled by an adult during an hour of respiration[15], to the 5 cm square section of the material.

### Note on Study Design and Limitations

It should be noted that, due to the limitations imposed by this outbreak, this study was done with available materials. Data from this study should be treated as preliminary and used to inform decisions about filtration media only in relation to existing studies which assess viral filtration through the collection of viral cultures.

Ten readings were taken for each material, although one reading for the disposable HEPA vacuum bag had to be later discarded due to a data transfer error. At least two different sections of each type of fabric were tested to ensure accurate representation of the material. Zero readings were taken on the particle testers regularly to ensure proper functioning.

## RESULTS

### Materials

All materials blocked some ultrafine particles (see Figure 2). A 3M N95 mask and hospital-grade surgical mask were tested for the sake of comparison. Two types of vacuum bag, a disposable HEPA vacuum bag and a washable HEPA vacuum bag, were evaluated due to the number of people attempting to utilize these materials as face mask filters. Eighteen fabrics were tested as a single layer. Lastly, fabrics were layered to represent potential mask designs. For this test, fusible interfacing was heat bonded to another layer.

FIGURE 2 HERE

*Figure 2: The filtration efficiency of tested fabrics and fabric combinations with error bars showing 95% confidence.*

HEPA vacuum bags blocked the most ultrafine particles, with the N95 mask from 3M blocking the second greatest percentage of particles.

1  
2  
3  
4 Repurposing HEPA filters holds great promise for emergency face masks; however, great care  
5 should be taken that the component materials within the filter do not pose dangers to those  
6 making or wearing the face mask. While the single-use HEPA vacuum bag tested showed the  
7 greatest ability to filter ultrafine particles, the layers fell apart when the material was cut,  
8 exposing inner layers of the fabric. Vacuum bags may have component materials which are  
9 effective at filtering particles but which are unsafe to inhale or come into close contact with the  
10 face. The reusable, washable HEPA bags had a construction more suitable to creating  
11 emergency face masks as the material held together well and did not expose inner fibers, but the  
12 safety of the materials used are also unknown.  
13  
14

15  
16 The filtration efficiencies of select materials were tested when damp (see Figure 3). Only minor  
17 differences in filtration efficiency were noted for quilting cotton, cotton flannel, and craft felt.  
18 Denim showed a significant decrease in efficiency while the HEPA single-use vacuum bags  
19 showed an increase in efficiency when damp.  
20

21  
22 Figure 3 also provides breathing resistance, fabric composition, FE, and standard deviation. The  
23 most suitable fabrics for face masks are those with a high FE but low breathing resistance.  
24 Denim jeans and windbreaker fabric blocked a high proportion of ultrafine particles but were  
25 extremely difficult to breathe through (see Figure 3). The windbreaker fabric may be suited to a  
26 loose-fitting face mask which protects the wearer from liquid droplets or splashes but is  
27 unsuitable for filtration.  
28

29  
30 Suitable materials which showed high filtration efficiency and low breathing resistance included  
31 felted wool, quilting cotton, and cotton flannel. A single sock held flat compared well with the  
32 quilting cotton and, when pressed tight against the nose and mouth, may provide emergency  
33 protection.  
34  
35

### 36 **Nonwoven Fusible Interfacing**

37  
38 Nonwoven fusible interfacing, the kind used for stiffening collars and other areas in garments,  
39 was able to significantly improve the ability of the fabrics to filter ultrafine particles without  
40 increasing breathing resistance. Of particular note, we found that brands exhibited significant  
41 differences in filtering performance. HTC brand lightweight interfacing was more effective than  
42 Heat-n-Bond brand lightweight interfacing. Applying two layers of the Heat-n-Bond achieved  
43 similar improvements to filtration efficiency as the HTC brand. Wonder Under, a double sided,  
44 heavyweight fusible interfacing for constructing bags and craft projects, showed similar filtration  
45 ability to the HTC brand but may be too stiff to be suitable for face mask design.  
46  
47

### 48 **Material Combinations**

49  
50 When layered to create potential face mask configurations, common fabrics were able to achieve  
51 much higher levels of ultrafine particle filtration (see Figure 2). Some material combinations  
52 were able to filter out higher percentages of ultrafine particles than the surgical or N95 masks  
53 tested, although this should not be taken to mean they provide higher levels of protection from  
54 viruses. All fabric combinations scored between a 2 and 3 on the breathing resistance test,  
55 indicating they were more difficult to breathe through than an N95 mask.  
56  
57  
58  
59

## FIGURE 3 HERE

*Figure 3: Chart of materials composition, breathing resistance, mean FE, standard deviation of FE, and, where available, FE when damp.*

## DISCUSSION

Our data suggests that, in times of severe supply shortage, common fabrics can be layered to create face masks which protect wearers and others from a significant percentage of ultrafine particles. It should not be inferred that these layered fabrics can protect wearers from more viral particles than N95 masks or surgical masks as our study did not discriminate between viral particles and other ultrafine particles. Many viruses are carried on droplets or other particles significantly larger than those in tested here. Furthermore, these results do not incorporate the challenges of achieving fit, a critical factor of face mask design. The benefit of using materials which offer high filtration efficiency are likely to be significantly reduced or negated if the mask is worn with a poor fit.

Many viruses are carried on droplets or other particles significantly larger than those in tested here. Previous studies have shown that large particles are more readily filtered[3,4] than smaller particles, indicating that a study of ultrafine particles will lead to a low 'baseline', upon which filtration efficiency of larger particles will increase. Moreover, ultrafine particles tend to pose high risks during other emergency situations when fabric face masks are needed, such as forest fire outbreaks and times of high, concentrated pollution.

### The Effect of Velocity on Filtration Efficiency

The flow rate of air used in this study represents the velocity of air expelled during human coughing[7] and is the first such study to evaluate fabric filtration under high velocities. A velocity of 16.5 m/s or 1650 cm/s was chosen to represent the face velocity of an adult coughing[7]. N95 filtration efficiency of NaCl was seen to decrease with velocity in prior filtration studies, from 99% in Rengasamy et al's evaluation at 0.165 m/s to 85% in Konda et al's evaluation at 0.26 m/s. As the velocity was up to 100 times greater than Rengasamy et al's and 63 times greater than Konda et al's, filtration efficiency was expected to be significantly lower if velocity impacts filtration efficiency. Our results support the idea that velocity has a significant impact on filtration efficiency.

Popular mask filtration which specify a face velocity include FDA-PFE, and ASTM-PFE and utilize velocities ranging from 0.5 to 25 cm/sec. Several testing methods do not specify a face velocity but instead provide flow rate for particle generation. While face velocity cannot be derived from flow rate, the flow rates utilized in these methods of 85 L/min in the NIOSHE NaCl test and 28.3 L/min in the ASTM-BFE test are lower than Konda et al's upper flow rate of 90 L/min, which corresponded to a face velocity of 0.26 m/s.

No prior studies have evaluated the ability of N95 face masks to filter particles at such high face velocities which can be used as a direct comparison. Rangasamy's 2015 study on synthetic blood penetration of N95 masks found that the number of respirator samples which failed the blood penetration test increased with increasing test velocities[10]. This, along with our findings, indicates a strong need to further evaluate mask filtration at high velocities. While a leak around the downstream testing port could lead to a lowered particle count, the possibility of low performance at high velocities should be eliminated through further study.

### Comparing Fabric Filtration Efficiency

Although the results from higher velocity tests are significantly lower than previous tests, the relationship between the efficiency of the tested materials remains highly consistent with prior studies. The average velocity used in prior studies is 0.20 m/s, which is 82.5% of the velocity used in the prior study. When the values for high velocity filtration are increased by 82.5%, the data compares closely with data from previous research. Figure 4 compares data from studies which examine fabric filtration. Where applicable, the data chosen represented similar particle size filtration and the highest velocities offered. It should be noted that each test utilizes different methods of testing filtration efficiency and different brands of materials. Konda et al applies a maximum face velocity of 0.26 m/s utilizing NaCl aerosol (approximately 0.74  $\mu\text{m}$ ). Rangasamy et al similarly uses aerosolized NaCl at the lowest face velocity of 0.165 m/s. Davies et al assesses the filtration of Bacteriophage MS2 (0.023  $\mu\text{m}$ ) at a face velocity of 0.2 m/s. Despite the differences in testing method, velocities used, and differences in product brands, the compiled data shows close groupings of filtration efficiency. Data on T-Shirt filtration in the present study is presented for both the lightweight and heavyweight t-Shirt.

#### FIGURE 4 HERE

*Figure 4: A comparison of existing data on fabric ultrafine filtration. Data chosen represents the highest velocity for each study. Data from this study was adjusted to proportionally represent a velocity of 0.2 m/s for this comparison. Data from Rangasamy et al is estimated from the included graphs, as statistical information about the data was not provided.*

A comparison showed that no one study method consistently produced the highest results. Konda, who recorded the highest fabric FE also recorded the lowest FE for N95 and surgical masks. Surprisingly, Rangasamy et al's data does not closely resemble Konda et al's, although both studies compared NaCl filtration. This may be a factor of the Konda et al's filtration studied at a greater velocity than Rangasamy et al uses, another indication for the importance of velocity on filtration. Our FE for fabric was frequently lower than others, a fact which may be accounted for with our single wash of the material before testing[11] and provide further evidence that washing fabric masks reduces their filtration efficiency.

### Safety Considerations

It is suggested homemade face masks should not be used in place of other protective measures such as self-isolation or social distancing. Rather, our results suggest homemade face masks may be a viable protective measure for those who cannot remain isolated and cannot obtain commercial face masks.

1  
2  
3  
4 Repurposing material for homemade face masks comes with its own risks. Consideration should  
5 be given to respiratory hazards which may arise from the material used to construct a homemade  
6 face mask. For example, concern has been expressed that certain HEPA vacuum bags include  
7 fibers which, if inhaled, can cause lung injury. Lint and fibers from fabric, when inhaled in large  
8 quantities, and known to contribute to multiple lung problems including asthma, byssinosis, and  
9 bronchitis. For this reason, we would caution those needing to create homemade face masks to  
10 ensure all material is safe, nontoxic and lint-free. Fabrics which readily shed fibers may not be  
11 suited for face mask design. The risks associated with such materials are an important area of  
12 further study, as large numbers of people are currently creating, wearing, washing, distributing,  
13 and selling homemade face masks. Further research should further evaluate the ability of these  
14 materials and material combinations to filter specific viruses, pollutants, and other harmful  
15 airborne particles. Additional research on homemade face mask fit and fit testing is also critical  
16 at this time.  
17  
18  
19

20 It is our hope that this study can assist home sewers and makers to create the best face mask  
21 possible when standardized commercial personal protective equipment is unavailable. Our study  
22 shows face masks can be created from common fabrics to provide wearers with significant  
23 protection from ultrafine particles. Until further research can establish the safety and viral  
24 filtration of fabric face masks, we suggest the use of approved respiratory protection whenever  
25 possible and the use of homemade face masks only when these products are unavailable.  
26  
27

28 It should be noted that the results of this study may also inform emergency mask creation in  
29 response to environmental emergencies where ultrafine particle levels are particularly dangerous,  
30 such as in the case of smoke or smog. Repeated face mask shortages during the California  
31 wildfires over the past few years have illustrated the recurring need for scientific data to guide  
32 the design of homemade face masks when commercial supply chains are unable to meet demand.  
33  
34  
35

## 36 REFERENCES

- 37 1. What Countries Require Masks in Public [Internet]. #Masks4All. Available from:  
38 <https://masks4all.co/what-countries-require-masks-in-public/>
- 39 2. Davies A, Thompson KA, Giri K, Kafatos G, Walker J, Bennett A. Testing the efficacy of  
40 homemade masks: would they protect in an influenza pandemic? *Disaster Med Public*  
41 *Health Prep.* 2013;7(4):413–8.
- 42 3. Konda A, Prakash A, Moss GA, Schmoldt M, Grant GD, Guha S. Aerosol Filtration  
43 Efficiency of Common Fabrics Used in Respiratory Cloth Masks. *ACS Nano.* 2020;
- 44 4. Rengasamy S, Eimer B, Shaffer RE. Simple respiratory protection - Evaluation of the  
45 filtration performance of cloth masks and common fabric materials against 20-1000 nm  
46 size particles. *Ann Occup Hyg.* 2010;54(7):789–98.
- 47 5. National Centers for Disease Control and Prevention. Use of Cloth Face Coverings to  
48 Help Slow the Spread of COVID-19 [Internet]. 2020. Available from:  
49 [https://www.cdc.gov/coronavirus/2019-ncov/prevent-getting-sick/diy-cloth-face-](https://www.cdc.gov/coronavirus/2019-ncov/prevent-getting-sick/diy-cloth-face-coverings.html)  
50 [coverings.html](https://www.cdc.gov/coronavirus/2019-ncov/prevent-getting-sick/diy-cloth-face-coverings.html)  
51  
52  
53  
54  
55  
56  
57  
58  
59

6. National Centers for Disease Control and Prevention. Strategies for Optimizing the Supply of Face masks [Internet]. 2010. Available from: <https://www.cdc.gov/coronavirus/2019-ncov/hcp/ppe-strategy/face-masks.html>
7. Zhu SW, Kato S, Yang JH. Study on transport characteristics of saliva droplets produced by coughing in a calm indoor environment. *Build Environ*. 2006;41(12):1691–702.
8. Tang JW, Nicolle AD, Klettner CA, Pantelic J, Wang L, Suhaimi A Bin, et al. Airflow Dynamics of Human Jets: Sneezing and Breathing - Potential Sources of Infectious Aerosols. *PLoS One*. 2013;8(4):1–7.
9. Delft University of Technology. Project Mask [Internet]. Delft, Netherlands: YouTube; 2020. Available from: <https://www.youtube.com/watch?v=i968cqeWyyY>
10. Rengasamy S, Sbarra D, Nwoko J, Shaffer R. Resistance to synthetic blood penetration of National Institute for Occupational Safety and Health-approved N95 filtering facepiece respirators and surgical N95 respirators. *Am J Infect Control* [Internet]. 2015;43(11):1190–6. Available from: <http://dx.doi.org/10.1016/j.ajic.2015.06.014>
11. Neupane BB, Mainali S, Sharma A, Giri B. Optical microscopic study of surface morphology and filtering efficiency of face masks. *Peer J*. 2019;
12. Hutten IM. *Handbook of Nonwoven Filter Media*. 2nd ed. Butterworth-Heinemann; 2015. 343–408 p.
13. Fennelly KP. Particle sizes of infectious aerosols: implications for infection control. *Lancet Respir Med* 2020;2600(20):1–11. Available from: [http://dx.doi.org/10.1016/S2213-2600\(20\)30323-4](http://dx.doi.org/10.1016/S2213-2600(20)30323-4)
14. Kwon SB, Park J, Jang J, Cho Y, Park DS, Kim C, et al. Study on the initial velocity distribution of exhaled air from coughing and speaking. *Chemosphere* [Internet]. 2012;87(11):1260–4. Available from: <http://dx.doi.org/10.1016/j.chemosphere.2012.01.032>
15. Zieliński J, Przybylski J. How much water is lost during breathing? *Pneumonol Alergol Pol* [Internet]. 2012;80(4):339–42. Available from: <http://www.ncbi.nlm.nih.gov/pubmed/22714078>

~ ~ ~

## AUTHOR'S CONTRIBUTIONS

### **Eugenia O'Kelly**

Conceived of the study, developed study methodology, obtained study materials and testing apparatus, collected study data, wrote manuscript

### **Sophia Pirog**

Obtained study materials, analyzed data and performed calculations, designed graphs, edited manuscript

### **James Ward**

Developed study methodology, reviewed data, edited manuscript, supervised study

### **John Clarkson**

Developed study methodology, reviewed data, edited manuscript, supervised study

## AWKNOWLEDGMENTS

The authors would like to thank Corinne E. O'Kelly for supporting this research. We would also like to thank the many sewers, doctors, and designers who spoke with us about their needs and concerns.

## CONFLICT OF INTEREST / COMPETING INTERESTS

There are no conflicts of interests/competing interests for any of the paper's contributing authors.

## DATA STATEMENT

Data from this study is freely available under a CC BY license on Cambridge University's Apollo data repository.

**Link:** <https://doi.org/10.17863/CAM.51390>

**Citation:** O'Kelly, E., The Ability of Common Fabrics to Filter Ultrafine Particles [Data file]. Cambridge University: Cambridge, United Kingdom; 2020.<https://doi.org/10.17863/CAM.51390>

## FUNDING

This research received no specific grant from any funding agency in the public, commercial or not-for-profit sectors.



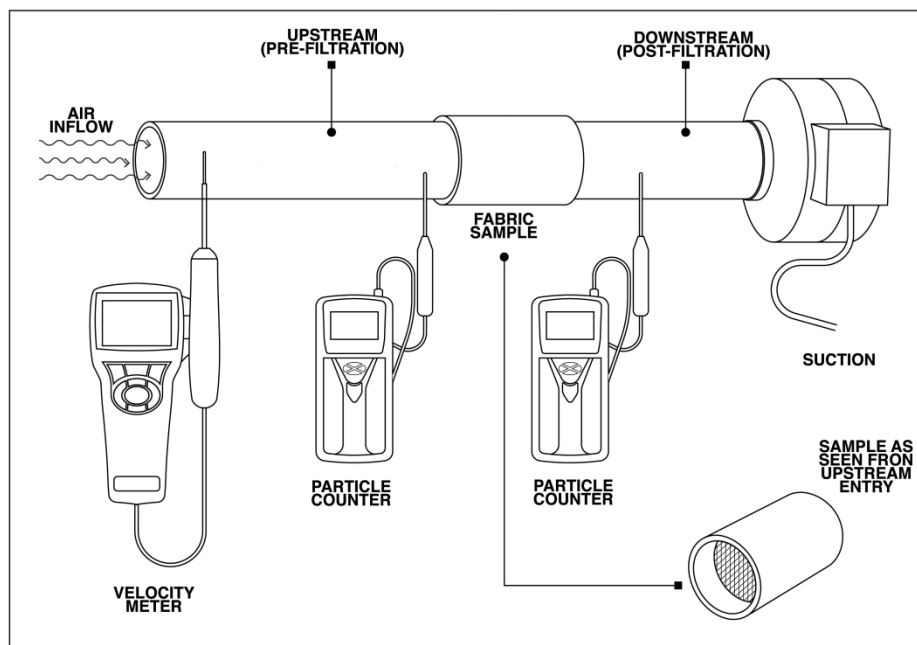

Figure 1: Diagram of experimental apparatus using two P-Trak Ultrafine Particle 8525 counters for simultaneous measurement and a TSI 9565 VelociCalc to measure face velocity.

1267x904mm (72 x 72 DPI)

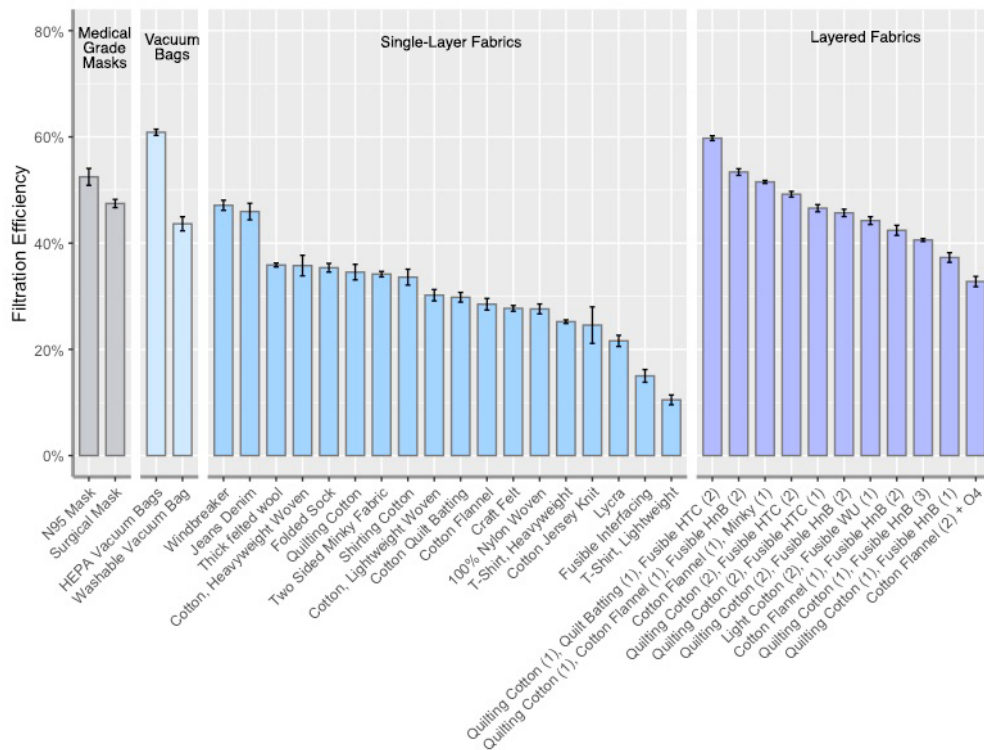

Figure 2: The filtration efficiency of tested fabrics and fabric combinations with error bars showing 95% confidence.

274x211mm (72 x 72 DPI)

| Fabric                      | Brand         | Fiber Composition         | Ease of Breathing Through Material | Dry       |       | Damp      |       |
|-----------------------------|---------------|---------------------------|------------------------------------|-----------|-------|-----------|-------|
|                             |               |                           |                                    | Mean % FE | SD    | Mean % FE | SD    |
| N95 Mask                    | 3M            | N/A                       | 1                                  | 52.47     | 2.222 | 45.68     | 1.247 |
| Surgical Mask               |               | N/A                       | 2                                  | 47.46     | 1.087 | 42.73     | 1.664 |
| Disposable HEPA Vacuum Bags | Kenmore       | N/A                       | 2                                  | 60.86     | 0.761 | 71.93     | 4.407 |
| Windbreaker                 |               | 100% Polyester            | 3                                  | 47.12     | 1.332 | 45.55     | 3.535 |
| Jeans Denim                 |               | 100% Cotton               | 3                                  | 45.94     | 2.176 | 30.69     | 5.314 |
| Washable Vacuum Bag HEPA    | CanineCoddler | N/A                       | 2                                  | 43.64     | 1.852 | 44.97     | 2.267 |
| Thick felted wool           | Weir Crafts   | 100% Merino Wool          | 0                                  | 35.87     | 0.502 |           |       |
| Cotton, Heavyweight Woven   |               | 100% Cotton               | 2                                  | 35.77     | 2.707 |           |       |
| Folded Sock                 |               | Cotton, Lycra             | 2                                  | 35.36     | 1.146 |           |       |
| Quilting Cotton             |               | 100% Cotton               | 1                                  | 34.54     | 2.047 | 31.88     | 1.406 |
| Two Sided Minky Fabric      |               | N/A                       | 1                                  | 34.17     | 0.716 |           |       |
| Shirting Cotton             |               | 100% Cotton               | 1                                  | 33.59     | 2.097 |           |       |
| Cotton, Lightweight Woven   |               | 100% Cotton               | 0                                  | 30.20     | 1.499 |           |       |
| Cotton Quilt Batting        |               | 100% Cotton               | 0                                  | 29.81     | 1.270 |           |       |
| Cotton Flannel              |               | 100% Cotton               | 1                                  | 28.50     | 1.529 | 30.14     | 1.196 |
| Craft Felt                  | Misscrafts    | Rayon, Acrylic, Polyester | 0                                  | 27.72     | 0.748 |           |       |
| 100% Nylon Woven            |               | 100% Nylon                | 3                                  | 27.61     | 1.303 |           |       |
| T-Shirt, Heavyweight        | Gildan        | 100% Cotton               | 1                                  | 25.21     | 0.471 |           |       |
| Cotton Jersey Knit          |               | 100% Cotton               | 0                                  | 24.56     | 4.800 |           |       |
| Lycra                       |               | 82% Nylon, 18% Spandex    | 0                                  | 21.60     | 1.477 |           |       |
| Fusible Interfacing         | HTC           | N/A                       | 0                                  | 15.00     | 1.672 |           |       |
| T-Shirt, Lightweight        | Retro Brant   | 50% Polyester, 50% Cotton | 0                                  | 10.50     | 1.293 |           |       |

1  
2  
3  
4  
5  
6  
7  
8  
9  
10  
11  
12  
13  
14  
15  
16  
17  
18  
19  
20  
21  
22  
23  
24  
25  
26  
27  
28  
29  
30  
31  
32  
33  
34  
35  
36  
37  
38  
39  
40  
41  
42  
43  
44  
45  
46  
47  
48  
49  
50  
51  
52  
53  
54  
55  
56  
57  
58  
59  
60



Figure 4: A comparison of existing data on fabric ultrafine filtration. Data chosen represents the highest velocity for each study. Data from this study was adjusted to proportionally represent a velocity of 0.2 m/s for this comparison. Data from Rengasamy et al is estimated from the included graphs, as statistical information about the data was not provided.

282x208mm (72 x 72 DPI)
